# Supplementary material
Source: publisher figshare collection journal article supplement (https://acs.figshare.com/ndownloader/files/5184061)
Supplement: Supplementary file 1 [file 5184061]

data_Cp*Zr(NPt-Bu3)Cl2
_audit_creation_method SHELXL-97 
_chemical_formula_sum 
'C22 H42 Cl2 N P Zr' 
_chemical_formula_weight 513.66 
loop_ 
_atom_type_symbol 
_atom_type_description 
_atom_type_scat_dispersion_real 
_atom_type_scat_dispersion_imag 
_atom_type_scat_source 
'C' 'C' 0.0033 0.0016 
'International Tables Vol C Tables 4.2.6.8 and 6.1.1.4' 
'H' 'H' 0.0000 0.0000 
'International Tables Vol C Tables 4.2.6.8 and 6.1.1.4' 
'N' 'N' 0.0061 0.0033 
'International Tables Vol C Tables 4.2.6.8 and 6.1.1.4' 
'P' 'P' 0.1023 0.0942 
'International Tables Vol C Tables 4.2.6.8 and 6.1.1.4' 
'Cl' 'Cl' 0.1484 0.1585 
'International Tables Vol C Tables 4.2.6.8 and 6.1.1.4' 
'Zr' 'Zr' -2.9673 0.5597 
'International Tables Vol C Tables 4.2.6.8 and 6.1.1.4' 
_symmetry_cell_setting monoclinic 
_symmetry_space_group_name_H-M P2(1)/n
loop_ 
_symmetry_equiv_pos_as_xyz 
'x, y, z' 
'-x+1/2, y+1/2, -z+1/2' 
'-x, -y, -z' 
'x-1/2, -y-1/2, z-1/2' 
_cell_length_a 11.888(6) 
_cell_length_b 16.743(9) 
_cell_length_c 13.508(7) 
_cell_angle_alpha 90.00 
_cell_angle_beta 96.934(9) 
_cell_angle_gamma 90.00 
_cell_volume 2669(2) 
_cell_formula_units_Z 4 
_cell_measurement_temperature 293(2) 
_cell_measurement_theta_min 2.0
_cell_measurement_theta_max 25.0
_exptl_crystal_size_max 0.27 
_exptl_crystal_size_mid 0.22
_exptl_crystal_size_min 0.18
_exptl_crystal_density_diffrn 1.278 
_exptl_crystal_density_method 'not measured' 
_exptl_crystal_F_000 1080 
_exptl_absorpt_coefficient_mu 0.680 
_exptl_absorpt_correction_type sadabs
_exptl_absorpt_correction_T_min 0.184894 
_exptl_absorpt_correction_T_max 0.256576 
_diffrn_ambient_temperature 293(2) 
_diffrn_radiation_wavelength 0.71073 
_diffrn_radiation_type MoK\a 
_diffrn_radiation_source 'fine-focus sealed tube' 
_diffrn_radiation_monochromator graphite 
_diffrn_reflns_number 11059 
_diffrn_reflns_av_R_equivalents 0.0133 
_diffrn_reflns_av_sigmaI/netI 0.0111 
_diffrn_reflns_limit_h_min -7 
_diffrn_reflns_limit_h_max 13 
_diffrn_reflns_limit_k_min -18 
_diffrn_reflns_limit_k_max 17 
_diffrn_reflns_limit_l_min -14 
_diffrn_reflns_limit_l_max 15 
_diffrn_reflns_theta_min 1.95 
_diffrn_reflns_theta_max 23.24 
_reflns_number_total 3807 
_reflns_number_gt 3400 
_reflns_threshold_expression >2sigma(I) 
_computing_structure_solution 'SHELXS-97 (Sheldrick, 1990)' 
_computing_structure_refinement 'SHELXL-97 (Sheldrick, 1997)' 
_refine_special_details 
; 
Refinement of F^2^ against ALL reflections. The weighted R-factor wR and 
goodness of fit S are based on F^2^, conventional R-factors R are based 
on F, with F set to zero for negative F^2^. The threshold expression of 
F^2^ > 2sigma(F^2^) is used only for calculating R-factors(gt) etc. and is 
not relevant to the choice of reflections for refinement. R-factors based 
on F^2^ are statistically about twice as large as those based on F, and R- 
factors based on ALL data will be even larger. 
; 
_refine_ls_structure_factor_coef Fsqd 
_refine_ls_matrix_type full 
_refine_ls_weighting_scheme calc 
_refine_ls_weighting_details 
'calc w=1/[\s^2^(Fo^2^)+(0.0459P)^2^+1.2888P] where P=(Fo^2^+2Fc^2^)/3' 
_atom_sites_solution_primary direct 
_atom_sites_solution_secondary difmap 
_atom_sites_solution_hydrogens geom 
_refine_ls_hydrogen_treatment mixed 
_refine_ls_extinction_method none 
_refine_ls_number_reflns 3807 
_refine_ls_number_parameters 244 
_refine_ls_number_restraints 0 

_refine_ls_R_factor_all 0.0302 
_refine_ls_R_factor_gt 0.0249 
_refine_ls_wR_factor_ref 0.0751 
_refine_ls_wR_factor_gt 0.0694 
_refine_ls_goodness_of_fit_ref 1.025 
_refine_ls_restrained_S_all 1.025 
_refine_ls_shift/su_max 0.001 
_refine_ls_shift/su_mean 0.000 
loop_ 
_atom_site_label 
_atom_site_type_symbol 
_atom_site_fract_x 
_atom_site_fract_y 
_atom_site_fract_z 
_atom_site_U_iso_or_equiv 
_atom_site_adp_type 
_atom_site_occupancy 
_atom_site_symmetry_multiplicity 
_atom_site_calc_flag 
_atom_site_refinement_flags 
_atom_site_disorder_assembly 
_atom_site_disorder_group 
Zr1 Zr 0.941516(18) 0.227829(13) 0.235812(16) 0.03918(10) Uani 1 1 d . . . 
Cl1 Cl 1.01014(6) 0.33624(4) 0.13803(5) 0.0644(2) Uani 1 1 d . . . 
Cl2 Cl 0.81152(7) 0.15365(5) 0.11694(6) 0.0750(2) Uani 1 1 d . . . 
P1 P 1.17199(5) 0.09842(3) 0.25047(4) 0.03789(15) Uani 1 1 d . . . 
N1 N 1.07074(15) 0.15864(11) 0.26237(13) 0.0406(4) Uani 1 1 d . . . 
C1 C 0.9328(2) 0.31772(17) 0.38385(19) 0.0545(6) Uani 1 1 d . . . 
C2 C 0.9183(2) 0.23857(16) 0.41657(18) 0.0506(6) Uani 1 1 d . . . 
C3 C 0.8134(2) 0.21048(16) 0.3702(2) 0.0531(6) Uani 1 1 d . . . 
C4 C 0.7605(2) 0.27308(17) 0.3117(2) 0.0560(7) Uani 1 1 d . . . 
C5 C 0.8337(3) 0.33942(16) 0.3195(2) 0.0573(7) Uani 1 1 d . . . 
C6 C 1.0314(3) 0.3720(2) 0.4173(3) 0.0910(11) Uani 1 1 d . . . 
H6A H 1.0152 0.4022 0.4743 0.136 Uiso 1 1 calc R . . 
H6B H 1.0434 0.4079 0.3641 0.136 Uiso 1 1 calc R . . 
H6C H 1.0983 0.3405 0.4347 0.136 Uiso 1 1 calc R . . 
C7 C 0.9952(3) 0.1951(2) 0.4948(2) 0.0827(11) Uani 1 1 d . . . 
H7A H 0.9730 0.2064 0.5593 0.124 Uiso 1 1 calc R . . 
H7B H 1.0719 0.2124 0.4927 0.124 Uiso 1 1 calc R . . 
H7C H 0.9900 0.1387 0.4824 0.124 Uiso 1 1 calc R . . 
C8 C 0.7603(3) 0.1306(2) 0.3903(3) 0.0877(11) Uani 1 1 d . . . 
H8A H 0.7160 0.1360 0.4449 0.132 Uiso 1 1 calc R . . 
H8B H 0.8189 0.0917 0.4069 0.132 Uiso 1 1 calc R . . 
H8C H 0.7123 0.1136 0.3318 0.132 Uiso 1 1 calc R . . 
C9 C 0.6427(3) 0.2693(3) 0.2556(3) 0.0964(13) Uani 1 1 d . . . 
H9A H 0.5889 0.2886 0.2976 0.145 Uiso 1 1 calc R . . 
H9B H 0.6249 0.2151 0.2368 0.145 Uiso 1 1 calc R . . 
H9C H 0.6394 0.3019 0.1969 0.145 Uiso 1 1 calc R . . 
C10 C 0.8087(4) 0.4209(2) 0.2740(3) 0.0972(12) Uani 1 1 d . . . 
H10A H 0.7690 0.4525 0.3179 0.146 Uiso 1 1 calc R . . 
H10B H 0.7628 0.4152 0.2109 0.146 Uiso 1 1 calc R . . 
H10C H 0.8786 0.4469 0.2643 0.146 Uiso 1 1 calc R . . 
C11 C 1.1155(2) -0.00700(14) 0.2550(2) 0.0527(6) Uani 1 1 d . . . 
C12 C 1.2066(3) -0.07249(17) 0.2730(3) 0.0801(10) Uani 1 1 d . . . 
H12A H 1.1707 -0.1238 0.2740 0.120 Uiso 1 1 calc R . . 
H12B H 1.2518 -0.0633 0.3358 0.120 Uiso 1 1 calc R . . 
H12C H 1.2542 -0.0712 0.2204 0.120 Uiso 1 1 calc R . . 
C13 C 1.0404(3) -0.02627(19) 0.1566(2) 0.0757(9) Uani 1 1 d . . . 
H13A H 1.0122 -0.0799 0.1591 0.113 Uiso 1 1 calc R . . 
H13B H 1.0844 -0.0213 0.1018 0.113 Uiso 1 1 calc R . . 
H13C H 0.9779 0.0104 0.1476 0.113 Uiso 1 1 calc R . . 
C14 C 1.0365(3) -0.01106(17) 0.3370(2) 0.0663(8) Uani 1 1 d . . . 
H14A H 1.0070 -0.0642 0.3404 0.100 Uiso 1 1 calc R . . 
H14B H 0.9750 0.0258 0.3219 0.100 Uiso 1 1 calc R . . 
H14C H 1.0782 0.0027 0.4001 0.100 Uiso 1 1 calc R . . 
C15 C 1.2247(2) 0.11892(16) 0.12586(19) 0.0549(6) Uani 1 1 d . . . 
C16 C 1.3008(3) 0.0516(2) 0.0913(3) 0.0828(10) Uani 1 1 d . . . 
H16A H 1.3251 0.0659 0.0284 0.124 Uiso 1 1 calc R . . 
H16B H 1.2585 0.0026 0.0841 0.124 Uiso 1 1 calc R . . 
H16C H 1.3659 0.0446 0.1400 0.124 Uiso 1 1 calc R . . 
C17 C 1.1239(3) 0.1317(2) 0.0453(2) 0.0697(8) Uani 1 1 d . . . 
H17A H 1.1512 0.1424 -0.0174 0.105 Uiso 1 1 calc R . . 
H17B H 1.0796 0.1762 0.0633 0.105 Uiso 1 1 calc R . . 
H17C H 1.0776 0.0845 0.0396 0.105 Uiso 1 1 calc R . . 
C18 C 1.2901(3) 0.19809(19) 0.1318(2) 0.0720(8) Uani 1 1 d . . . 
H18A H 1.3170 0.2086 0.0689 0.108 Uiso 1 1 calc R . . 
H18B H 1.3533 0.1946 0.1831 0.108 Uiso 1 1 calc R . . 
H18C H 1.2408 0.2406 0.1472 0.108 Uiso 1 1 calc R . . 
C19 C 1.2910(2) 0.11470(15) 0.35540(19) 0.0503(6) Uani 1 1 d . . . 
C20 C 1.4068(2) 0.0802(2) 0.3361(3) 0.0745(9) Uani 1 1 d . . . 
H20A H 1.4620 0.0911 0.3924 0.112 Uiso 1 1 calc R . . 
H20B H 1.4302 0.1045 0.2776 0.112 Uiso 1 1 calc R . . 
H20C H 1.4002 0.0235 0.3264 0.112 Uiso 1 1 calc R . . 
C21 C 1.3033(3) 0.20523(17) 0.3746(2) 0.0657(8) Uani 1 1 d . . . 
H21A H 1.3633 0.2146 0.4276 0.099 Uiso 1 1 calc R . . 
H21B H 1.2336 0.2261 0.3932 0.099 Uiso 1 1 calc R . . 
H21C H 1.3208 0.2314 0.3151 0.099 Uiso 1 1 calc R . . 
C22 C 1.2600(3) 0.07756(19) 0.4526(2) 0.0652(8) Uani 1 1 d . . . 
H22A H 1.3207 0.0864 0.5051 0.098 Uiso 1 1 calc R . . 
H22B H 1.2481 0.0212 0.4433 0.098 Uiso 1 1 calc R . . 
H22C H 1.1920 0.1019 0.4700 0.098 Uiso 1 1 calc R . . 
loop_ 
_atom_site_aniso_label 
_atom_site_aniso_U_11 
_atom_site_aniso_U_22 
_atom_site_aniso_U_33 
_atom_site_aniso_U_23 
_atom_site_aniso_U_13 
_atom_site_aniso_U_12 
Zr1 0.03879(15) 0.04320(16) 0.03432(15) 0.00536(9) -0.00056(10) 0.00286(9) 
Cl1 0.0705(5) 0.0591(4) 0.0639(4) 0.0238(3) 0.0087(3) 0.0021(3) 
Cl2 0.0613(4) 0.0953(6) 0.0632(4) -0.0161(4) -0.0142(3) -0.0081(4) 
P1 0.0398(3) 0.0346(3) 0.0390(3) 0.0010(2) 0.0036(2) -0.0012(2) 
N1 0.0428(11) 0.0416(11) 0.0367(10) 0.0032(8) 0.0024(8) 0.0011(8) 
C1 0.0507(15) 0.0616(16) 0.0527(15) -0.0130(13) 0.0125(12) -0.0048(13) 
C2 0.0494(15) 0.0686(17) 0.0347(13) 0.0034(11) 0.0086(11) 0.0142(13) 
C3 0.0477(15) 0.0586(16) 0.0556(16) 0.0013(12) 0.0172(12) 0.0002(12) 
C4 0.0411(14) 0.0714(19) 0.0545(16) -0.0052(13) 0.0014(12) 0.0114(13) 
C5 0.0709(18) 0.0482(15) 0.0550(15) 0.0049(12) 0.0163(14) 0.0168(14) 
C6 0.075(2) 0.105(3) 0.096(3) -0.043(2) 0.0221(19) -0.029(2) 
C7 0.084(2) 0.121(3) 0.0435(15) 0.0135(17) 0.0098(15) 0.043(2) 
C8 0.091(3) 0.072(2) 0.108(3) 0.0096(19) 0.043(2) -0.0128(19) 
C9 0.0500(19) 0.128(3) 0.106(3) -0.023(2) -0.0131(19) 0.022(2) 
C10 0.131(3) 0.061(2) 0.105(3) 0.0169(19) 0.037(2) 0.035(2) 
C11 0.0574(16) 0.0373(13) 0.0623(16) 0.0016(11) 0.0028(13) -0.0066(12) 
C12 0.092(2) 0.0379(15) 0.110(3) 0.0020(16) 0.010(2) 0.0068(15) 
C13 0.089(2) 0.0589(18) 0.076(2) -0.0122(15) -0.0050(17) -0.0257(16) 
C14 0.0670(18) 0.0539(17) 0.078(2) 0.0158(14) 0.0085(15) -0.0167(14) 
C15 0.0622(17) 0.0572(16) 0.0485(14) -0.0016(12) 0.0192(13) -0.0013(13) 
C16 0.094(2) 0.082(2) 0.080(2) -0.0112(18) 0.0405(19) 0.0115(19) 
C17 0.089(2) 0.080(2) 0.0403(15) 0.0027(14) 0.0097(14) -0.0057(17) 
C18 0.079(2) 0.074(2) 0.0670(19) 0.0122(16) 0.0260(16) -0.0158(17) 
C19 0.0411(13) 0.0519(15) 0.0554(15) -0.0010(12) -0.0042(11) -0.0003(11) 
C20 0.0437(16) 0.082(2) 0.095(2) -0.0004(18) -0.0023(15) 0.0054(15) 
C21 0.0615(18) 0.0612(17) 0.0700(19) -0.0116(15) -0.0100(15) -0.0110(14) 
C22 0.0627(18) 0.078(2) 0.0508(16) 0.0071(14) -0.0117(13) 0.0011(15) 
_geom_special_details 
; 
All esds (except the esd in the dihedral angle between two l.s. planes) 
are estimated using the full covariance matrix. The cell esds are taken 
into account individually in the estimation of esds in distances, angles 
and torsion angles; correlations between esds in cell parameters are only 
used when they are defined by crystal symmetry. An approximate (isotropic) 
treatment of cell esds is used for estimating esds involving l.s. planes. 
; 
loop_ 
_geom_bond_atom_site_label_1 
_geom_bond_atom_site_label_2 
_geom_bond_distance 
_geom_bond_site_symmetry_2 
_geom_bond_publ_flag 
Zr1 N1 1.923(2) . ? 
Zr1 Cl2 2.4311(10) . ? 
Zr1 Cl1 2.4423(11) . ? 
Zr1 C2 2.496(3) . ? 
Zr1 C1 2.515(3) . ? 
Zr1 C3 2.523(3) . ? 
Zr1 C5 2.600(3) . ? 
Zr1 C4 2.605(3) . ? 
P1 N1 1.593(2) . ? 
P1 C11 1.892(3) . ? 
P1 C15 1.897(3) . ? 
P1 C19 1.897(3) . ? 
C1 C2 1.414(4) . ? 
C1 C5 1.424(4) . ? 
C1 C6 1.508(4) . ? 
C2 C3 1.407(4) . ? 
C2 C7 1.499(4) . ? 
C3 C4 1.414(4) . ? 
C3 C8 1.518(4) . ? 
C4 C5 1.407(4) . ? 
C4 C9 1.512(4) . ? 
C5 C10 1.512(4) . ? 
C11 C14 1.538(4) . ? 
C11 C12 1.540(4) . ? 
C11 C13 1.543(4) . ? 
C15 C17 1.533(4) . ? 
C15 C18 1.534(4) . ? 
C15 C16 1.553(4) . ? 
C19 C22 1.537(4) . ? 
C19 C21 1.542(4) . ? 
C19 C20 1.544(4) . ? 
loop_ 
_geom_angle_atom_site_label_1 
_geom_angle_atom_site_label_2 
_geom_angle_atom_site_label_3 
_geom_angle 
_geom_angle_site_symmetry_1 
_geom_angle_site_symmetry_3 
_geom_angle_publ_flag 
N1 Zr1 Cl2 104.20(7) . . ? 
N1 Zr1 Cl1 103.72(7) . . ? 
Cl2 Zr1 Cl1 104.46(4) . . ? 
N1 Zr1 C2 92.35(8) . . ? 
Cl2 Zr1 C2 123.12(7) . . ? 
Cl1 Zr1 C2 123.98(7) . . ? 
N1 Zr1 C1 108.71(9) . . ? 
Cl2 Zr1 C1 138.34(7) . . ? 
Cl1 Zr1 C1 91.93(8) . . ? 
C2 Zr1 C1 32.78(9) . . ? 
N1 Zr1 C3 109.53(9) . . ? 
Cl2 Zr1 C3 91.47(8) . . ? 
Cl1 Zr1 C3 138.13(7) . . ? 
C2 Zr1 C3 32.55(9) . . ? 
C1 Zr1 C3 53.88(9) . . ? 
N1 Zr1 C5 140.92(9) . . ? 
Cl2 Zr1 C5 110.31(8) . . ? 
Cl1 Zr1 C5 85.15(7) . . ? 
C2 Zr1 C5 53.45(8) . . ? 
C1 Zr1 C5 32.27(9) . . ? 
C3 Zr1 C5 52.98(9) . . ? 
N1 Zr1 C4 141.35(9) . . ? 
Cl2 Zr1 C4 85.37(7) . . ? 
Cl1 Zr1 C4 110.02(7) . . ? 
C2 Zr1 C4 53.14(9) . . ? 
C1 Zr1 C4 52.98(9) . . ? 
C3 Zr1 C4 31.95(9) . . ? 
C5 Zr1 C4 31.37(9) . . ? 
N1 P1 C11 108.16(12) . . ? 
N1 P1 C15 108.03(11) . . ? 
C11 P1 C15 110.72(12) . . ? 
N1 P1 C19 109.76(11) . . ? 
C11 P1 C19 110.22(12) . . ? 
C15 P1 C19 109.91(13) . . ? 
P1 N1 Zr1 163.49(12) . . ? 
C2 C1 C5 107.9(2) . . ? 
C2 C1 C6 126.2(3) . . ? 
C5 C1 C6 125.8(3) . . ? 
C2 C1 Zr1 72.90(15) . . ? 
C5 C1 Zr1 77.17(15) . . ? 
C6 C1 Zr1 119.59(19) . . ? 
C3 C2 C1 108.0(2) . . ? 
C3 C2 C7 125.7(3) . . ? 
C1 C2 C7 126.0(3) . . ? 
C3 C2 Zr1 74.76(15) . . ? 
C1 C2 Zr1 74.32(14) . . ? 
C7 C2 Zr1 121.63(18) . . ? 
C2 C3 C4 108.1(2) . . ? 
C2 C3 C8 125.5(3) . . ? 
C4 C3 C8 125.9(3) . . ? 
C2 C3 Zr1 72.69(15) . . ? 
C4 C3 Zr1 77.23(16) . . ? 
C8 C3 Zr1 122.1(2) . . ? 
C5 C4 C3 108.3(2) . . ? 
C5 C4 C9 126.7(3) . . ? 
C3 C4 C9 124.9(3) . . ? 
C5 C4 Zr1 74.13(16) . . ? 
C3 C4 Zr1 70.82(15) . . ? 
C9 C4 Zr1 123.4(2) . . ? 
C4 C5 C1 107.6(2) . . ? 
C4 C5 C10 126.3(3) . . ? 
C1 C5 C10 125.9(3) . . ? 
C4 C5 Zr1 74.50(15) . . ? 
C1 C5 Zr1 70.56(14) . . ? 
C10 C5 Zr1 123.7(2) . . ? 
C14 C11 C12 109.5(2) . . ? 
C14 C11 C13 105.8(2) . . ? 
C12 C11 C13 108.1(2) . . ? 
C14 C11 P1 108.32(18) . . ? 
C12 C11 P1 115.1(2) . . ? 
C13 C11 P1 109.76(19) . . ? 
C17 C15 C18 105.4(2) . . ? 
C17 C15 C16 108.8(3) . . ? 
C18 C15 C16 109.5(3) . . ? 
C17 C15 P1 109.96(19) . . ? 
C18 C15 P1 109.23(19) . . ? 
C16 C15 P1 113.7(2) . . ? 
C22 C19 C21 106.4(2) . . ? 
C22 C19 C20 107.6(2) . . ? 
C21 C19 C20 109.1(2) . . ? 
C22 C19 P1 110.25(18) . . ? 
C21 C19 P1 108.31(18) . . ? 
C20 C19 P1 114.8(2) . . ? 
_diffrn_measured_fraction_theta_max 0.996 
_diffrn_reflns_theta_full 23.24 
_diffrn_measured_fraction_theta_full 0.996 
_refine_diff_density_max 0.238 
_refine_diff_density_min -0.293 
_refine_diff_density_rms 0.047 
#===end
data_Cp2Zr(NPt-Bu3)Cl 
_audit_creation_method SHELXL-97 
_chemical_formula_sum 
'C22 H37 Cl N P Zr' 
_chemical_formula_weight 473.17 
loop_ 
_atom_type_symbol 
_atom_type_description 
_atom_type_scat_dispersion_real 
_atom_type_scat_dispersion_imag 
_atom_type_scat_source 
'C' 'C' 0.0033 0.0016 
'International Tables Vol C Tables 4.2.6.8 and 6.1.1.4' 
'H' 'H' 0.0000 0.0000 
'International Tables Vol C Tables 4.2.6.8 and 6.1.1.4' 
'N' 'N' 0.0061 0.0033 
'International Tables Vol C Tables 4.2.6.8 and 6.1.1.4' 
'P' 'P' 0.1023 0.0942 
'International Tables Vol C Tables 4.2.6.8 and 6.1.1.4' 
'Cl' 'Cl' 0.1484 0.1585 
'International Tables Vol C Tables 4.2.6.8 and 6.1.1.4' 
'Zr' 'Zr' -2.9673 0.5597 
'International Tables Vol C Tables 4.2.6.8 and 6.1.1.4' 
_symmetry_cell_setting orthorhombic 
_symmetry_space_group_name_H-M P2(1)2(1)2(1) 
loop_ 
_symmetry_equiv_pos_as_xyz 
'x, y, z' 
'-x+1/2, -y, z+1/2' 
'-x, y+1/2, -z+1/2' 
'x+1/2, -y+1/2, -z' 
_cell_length_a 8.472(4) 
_cell_length_b 14.295(7) 
_cell_length_c 19.506(9) 
_cell_angle_alpha 90.00 
_cell_angle_beta 90.00 
_cell_angle_gamma 90.00 
_cell_volume 2362(2) 
_cell_formula_units_Z 4 
_cell_measurement_temperature 293(2) 
_cell_measurement_theta_min 2.0
_cell_measurement_theta_max 25.0
_exptl_crystal_size_max 0.26 
_exptl_crystal_size_mid 0.25
_exptl_crystal_size_min 0.17
_exptl_crystal_density_diffrn 1.330 
_exptl_crystal_density_method 'not measured' 
_exptl_crystal_F_000 992 
_exptl_absorpt_coefficient_mu 0.653 
_exptl_absorpt_correction_type sadabs
_exptl_absorpt_correction_T_min 0.199065 
_exptl_absorpt_correction_T_max 0.256541 
_diffrn_ambient_temperature 293(2) 
_diffrn_radiation_wavelength 0.71073 
_diffrn_radiation_type MoK\a 
_diffrn_radiation_source 'fine-focus sealed tube' 
_diffrn_radiation_monochromator graphite 
_diffrn_reflns_number 10186 
_diffrn_reflns_av_R_equivalents 0.0354 
_diffrn_reflns_av_sigmaI/netI 0.0425 
_diffrn_reflns_limit_h_min -6 
_diffrn_reflns_limit_h_max 9 
_diffrn_reflns_limit_k_min -15 
_diffrn_reflns_limit_k_max 15 
_diffrn_reflns_limit_l_min -21 
_diffrn_reflns_limit_l_max 20 
_diffrn_reflns_theta_min 2.09 
_diffrn_reflns_theta_max 23.20 
_reflns_number_total 3372 
_reflns_number_gt 2705 
_reflns_threshold_expression >2sigma(I) 
_computing_structure_solution 'SHELXS-97 (Sheldrick, 1990)' 
_computing_structure_refinement 'SHELXL-97 (Sheldrick, 1997)' 
_refine_special_details 
; 
Refinement of F^2^ against ALL reflections. The weighted R-factor wR and 
goodness of fit S are based on F^2^, conventional R-factors R are based 
on F, with F set to zero for negative F^2^. The threshold expression of 
F^2^ > 2sigma(F^2^) is used only for calculating R-factors(gt) etc. and is 
not relevant to the choice of reflections for refinement. R-factors based 
on F^2^ are statistically about twice as large as those based on F, and R- 
factors based on ALL data will be even larger. 
; 
_refine_ls_structure_factor_coef Fsqd 
_refine_ls_matrix_type full 
_refine_ls_weighting_scheme calc 
_refine_ls_weighting_details 
'calc w=1/[\s^2^(Fo^2^)+(0.0866P)^2^+1.6832P] where P=(Fo^2^+2Fc^2^)/3' 
_atom_sites_solution_primary direct 
_atom_sites_solution_secondary difmap 
_atom_sites_solution_hydrogens geom 
_refine_ls_hydrogen_treatment mixed 
_refine_ls_extinction_method none 
_refine_ls_abs_structure_details 
'Flack H D (1983), Acta Cryst. A39, 876-881' 
_refine_ls_abs_structure_Flack 0.96(12) 
_refine_ls_number_reflns 3372 
_refine_ls_number_parameters 235 
_refine_ls_number_restraints 0 
_refine_ls_R_factor_all 0.0655 
_refine_ls_R_factor_gt 0.0493 
_refine_ls_wR_factor_ref 0.1372 
_refine_ls_wR_factor_gt 0.1288 
_refine_ls_goodness_of_fit_ref 1.018 
_refine_ls_restrained_S_all 1.018 
_refine_ls_shift/su_max 0.018 
_refine_ls_shift/su_mean 0.001 
loop_ 
_atom_site_label 
_atom_site_type_symbol 
_atom_site_fract_x 
_atom_site_fract_y 
_atom_site_fract_z 
_atom_site_U_iso_or_equiv 
_atom_site_adp_type 
_atom_site_occupancy 
_atom_site_symmetry_multiplicity 
_atom_site_calc_flag 
_atom_site_refinement_flags 
_atom_site_disorder_assembly 
_atom_site_disorder_group 
Zr1 Zr 0.78704(9) 0.73486(4) 0.65252(3) 0.0463(2) Uani 1 1 d . . . 
Cl1 Cl 0.5171(3) 0.7695(4) 0.60577(12) 0.1261(14) Uani 1 1 d . . . 
P1 P 0.65357(19) 0.72891(13) 0.82513(8) 0.0361(4) Uani 1 1 d . . . 
N1 N 0.7267(6) 0.7315(4) 0.7505(2) 0.0408(12) Uani 1 1 d . . . 
C1 C 0.873(3) 0.6182(10) 0.5594(8) 0.159(10) Uani 1 1 d . . . 
H1A H 0.8889 0.6354 0.5113 0.191 Uiso 1 1 calc R . . 
C2 C 0.994(2) 0.6189(12) 0.6090(13) 0.164(9) Uani 1 1 d . . . 
H2A H 1.1066 0.6298 0.6018 0.197 Uiso 1 1 calc R . . 
C3 C 0.921(2) 0.5768(8) 0.6652(7) 0.105(5) Uani 1 1 d . . . 
H3A H 0.9768 0.5567 0.7066 0.126 Uiso 1 1 calc R . . 
C4 C 0.769(2) 0.5569(6) 0.6524(7) 0.108(5) Uani 1 1 d . . . 
H4A H 0.7008 0.5206 0.6831 0.129 Uiso 1 1 calc R . . 
C5 C 0.727(2) 0.5839(9) 0.5858(9) 0.144(6) Uani 1 1 d . . . 
H5A H 0.6305 0.5679 0.5603 0.173 Uiso 1 1 calc R . . 
C6 C 0.9756(17) 0.8343(9) 0.5764(6) 0.097(4) Uani 1 1 d . . . 
H6A H 1.0243 0.8132 0.5335 0.116 Uiso 1 1 calc R . . 
C7 C 1.0441(15) 0.8247(8) 0.6435(7) 0.101(4) Uani 1 1 d . . . 
H7A H 1.1497 0.8006 0.6539 0.121 Uiso 1 1 calc R . . 
C8 C 0.9522(15) 0.8773(7) 0.6855(6) 0.083(3) Uani 1 1 d . . . 
H8A H 0.9809 0.8924 0.7329 0.099 Uiso 1 1 calc R . . 
C9 C 0.8194(17) 0.9121(6) 0.6535(6) 0.093(4) Uani 1 1 d . . . 
H9A H 0.7448 0.9573 0.6729 0.111 Uiso 1 1 calc R . . 
C10 C 0.832(2) 0.8859(9) 0.5814(6) 0.118(5) Uani 1 1 d . . . 
H10A H 0.7675 0.9089 0.5433 0.142 Uiso 1 1 calc R . . 
C11 C 0.602(2) 0.8532(11) 0.9426(7) 0.199(11) Uani 1 1 d . . . 
H11A H 0.6359 0.9083 0.9667 0.299 Uiso 1 1 calc R . . 
H11B H 0.6117 0.7998 0.9722 0.299 Uiso 1 1 calc R . . 
H11C H 0.4943 0.8603 0.9287 0.299 Uiso 1 1 calc R . . 
C12 C 0.8839(17) 0.8425(9) 0.8896(8) 0.144(7) Uani 1 1 d . . . 
H12A H 0.9072 0.8985 0.9148 0.216 Uiso 1 1 calc R . . 
H12B H 0.9411 0.8429 0.8471 0.216 Uiso 1 1 calc R . . 
H12C H 0.9146 0.7889 0.9161 0.216 Uiso 1 1 calc R . . 
C13 C 0.6733(12) 0.9248(5) 0.8305(6) 0.088(3) Uani 1 1 d . . . 
H13A H 0.7029 0.9807 0.8546 0.131 Uiso 1 1 calc R . . 
H13B H 0.5621 0.9261 0.8211 0.131 Uiso 1 1 calc R . . 
H13C H 0.7308 0.9212 0.7882 0.131 Uiso 1 1 calc R . . 
C14 C 0.7125(13) 0.8381(6) 0.8753(4) 0.062(2) Uani 1 1 d . . . 
C15 C 0.707(2) 0.6286(8) 0.9540(5) 0.142(6) Uani 1 1 d . . . 
H15A H 0.7473 0.5731 0.9753 0.213 Uiso 1 1 calc R . . 
H15B H 0.5956 0.6337 0.9632 0.213 Uiso 1 1 calc R . . 
H15C H 0.7602 0.6824 0.9722 0.213 Uiso 1 1 calc R . . 
C16 C 0.9197(13) 0.6255(8) 0.8658(8) 0.117(5) Uani 1 1 d . . . 
H16A H 0.9663 0.5738 0.8898 0.175 Uiso 1 1 calc R . . 
H16B H 0.9610 0.6831 0.8837 0.175 Uiso 1 1 calc R . . 
H16C H 0.9442 0.6209 0.8179 0.175 Uiso 1 1 calc R . . 
C17 C 0.6737(14) 0.5333(6) 0.8455(7) 0.113(4) Uani 1 1 d . . . 
H17A H 0.7135 0.4815 0.8717 0.169 Uiso 1 1 calc R . . 
H17B H 0.7090 0.5281 0.7989 0.169 Uiso 1 1 calc R . . 
H17C H 0.5604 0.5329 0.8467 0.169 Uiso 1 1 calc R . . 
C18 C 0.7337(16) 0.6234(5) 0.8758(4) 0.083(4) Uani 1 1 d . . . 
C19 C 0.4323(9) 0.7166(8) 0.8188(4) 0.075(3) Uani 1 1 d . . . 
C20 C 0.3591(13) 0.8043(8) 0.7895(8) 0.125(5) Uani 1 1 d . . . 
H20A H 0.2468 0.7965 0.7863 0.187 Uiso 1 1 calc R . . 
H20B H 0.4016 0.8158 0.7446 0.187 Uiso 1 1 calc R . . 
H20C H 0.3826 0.8564 0.8188 0.187 Uiso 1 1 calc R . . 
C21 C 0.3982(13) 0.6424(8) 0.7652(5) 0.099(4) Uani 1 1 d . . . 
H21A H 0.2862 0.6351 0.7603 0.149 Uiso 1 1 calc R . . 
H21B H 0.4439 0.5841 0.7794 0.149 Uiso 1 1 calc R . . 
H21C H 0.4431 0.6611 0.7222 0.149 Uiso 1 1 calc R . . 
C22 C 0.3524(12) 0.6821(8) 0.8855(5) 0.096(4) Uani 1 1 d . . . 
H22A H 0.2405 0.6779 0.8786 0.144 Uiso 1 1 calc R . . 
H22B H 0.3741 0.7253 0.9219 0.144 Uiso 1 1 calc R . . 
H22C H 0.3932 0.6215 0.8974 0.144 Uiso 1 1 calc R . . 
loop_ 
_atom_site_aniso_label 
_atom_site_aniso_U_11 
_atom_site_aniso_U_22 
_atom_site_aniso_U_33 
_atom_site_aniso_U_23 
_atom_site_aniso_U_13 
_atom_site_aniso_U_12 
Zr1 0.0542(4) 0.0459(4) 0.0388(4) 0.0016(3) 0.0069(3) 0.0007(3) 
Cl1 0.0822(17) 0.238(4) 0.0583(14) 0.018(2) -0.0188(12) 0.011(3) 
P1 0.0325(8) 0.0390(9) 0.0370(9) -0.0024(7) 0.0007(6) 0.0002(7) 
N1 0.039(3) 0.039(3) 0.044(3) 0.000(2) 0.000(2) -0.004(3) 
C1 0.31(3) 0.068(8) 0.101(12) -0.028(8) 0.121(16) -0.004(13) 
C2 0.145(16) 0.110(12) 0.24(2) -0.005(15) 0.100(16) 0.074(12) 
C3 0.145(13) 0.071(7) 0.098(10) 0.003(7) 0.031(10) 0.055(8) 
C4 0.178(16) 0.054(5) 0.091(9) -0.004(6) 0.032(11) -0.022(7) 
C5 0.22(2) 0.088(9) 0.124(12) -0.045(8) -0.049(14) -0.032(11) 
C6 0.116(11) 0.101(9) 0.073(8) 0.004(6) 0.035(7) -0.042(8) 
C7 0.096(8) 0.108(9) 0.099(9) 0.008(8) 0.031(8) -0.031(7) 
C8 0.099(9) 0.058(6) 0.091(8) -0.006(6) 0.033(7) -0.025(6) 
C9 0.144(11) 0.048(5) 0.086(8) 0.006(5) 0.039(10) 0.002(6) 
C10 0.174(16) 0.090(8) 0.090(9) 0.058(7) -0.012(10) -0.018(9) 
C11 0.32(3) 0.171(14) 0.106(10) -0.090(10) 0.122(14) -0.151(16) 
C12 0.153(14) 0.113(10) 0.165(13) 0.050(9) -0.091(11) -0.089(10) 
C13 0.087(8) 0.038(5) 0.138(9) -0.011(5) 0.030(7) 0.001(4) 
C14 0.082(6) 0.067(5) 0.038(4) -0.005(3) 0.000(5) -0.019(5) 
C15 0.260(19) 0.095(8) 0.071(7) 0.025(6) 0.039(10) 0.072(11) 
C16 0.072(7) 0.097(8) 0.181(14) -0.001(8) -0.059(9) 0.029(6) 
C17 0.109(10) 0.048(5) 0.181(12) -0.003(7) 0.051(10) 0.000(5) 
C18 0.153(12) 0.045(4) 0.050(5) 0.002(3) 0.026(6) 0.001(6) 
C19 0.030(4) 0.140(9) 0.055(5) -0.024(5) 0.000(3) 0.003(5) 
C20 0.062(7) 0.125(10) 0.188(13) -0.061(9) -0.049(8) 0.032(7) 
C21 0.082(8) 0.119(9) 0.096(8) 0.024(7) -0.034(6) -0.051(7) 
C22 0.055(6) 0.140(10) 0.093(8) 0.009(7) 0.016(6) -0.010(6) 
_geom_special_details 
; 
All esds (except the esd in the dihedral angle between two l.s. planes) 
are estimated using the full covariance matrix. The cell esds are taken 
into account individually in the estimation of esds in distances, angles 
and torsion angles; correlations between esds in cell parameters are only 
used when they are defined by crystal symmetry. An approximate (isotropic) 
treatment of cell esds is used for estimating esds involving l.s. planes. 
; 
loop_ 
_geom_bond_atom_site_label_1 
_geom_bond_atom_site_label_2 
_geom_bond_distance 
_geom_bond_site_symmetry_2 
_geom_bond_publ_flag 
Zr1 N1 1.978(5) . ? 
Zr1 Cl1 2.511(3) . ? 
Zr1 C7 2.534(11) . ? 
Zr1 C3 2.539(10) . ? 
Zr1 C9 2.548(9) . ? 
Zr1 C4 2.549(9) . ? 
Zr1 C8 2.553(10) . ? 
Zr1 C2 2.555(13) . ? 
Zr1 C1 2.571(12) . ? 
Zr1 C5 2.572(10) . ? 
Zr1 C10 2.595(10) . ? 
Zr1 C6 2.604(10) . ? 
P1 N1 1.583(5) . ? 
P1 C19 1.887(8) . ? 
P1 C14 1.910(8) . ? 
P1 C18 1.927(9) . ? 
C1 C2 1.41(3) . ? 
C1 C5 1.43(2) . ? 
C2 C3 1.40(2) . ? 
C3 C4 1.340(18) . ? 
C4 C5 1.403(19) . ? 
C6 C10 1.422(19) . ? 
C6 C7 1.438(17) . ? 
C7 C8 1.358(15) . ? 
C8 C9 1.379(16) . ? 
C9 C10 1.461(16) . ? 
C11 C14 1.624(15) . ? 
C12 C14 1.479(16) . ? 
C13 C14 1.552(12) . ? 
C15 C18 1.543(13) . ? 
C16 C18 1.588(17) . ? 
C17 C18 1.505(14) . ? 
C19 C20 1.511(15) . ? 
C19 C21 1.516(14) . ? 
C19 C22 1.548(12) . ? 
loop_ 
_geom_angle_atom_site_label_1 
_geom_angle_atom_site_label_2 
_geom_angle_atom_site_label_3 
_geom_angle 
_geom_angle_site_symmetry_1 
_geom_angle_site_symmetry_3 
_geom_angle_publ_flag 
N1 Zr1 Cl1 96.91(17) . . ? 
N1 Zr1 C7 107.6(3) . . ? 
Cl1 Zr1 C7 131.1(3) . . ? 
N1 Zr1 C3 89.9(4) . . ? 
Cl1 Zr1 C3 128.1(5) . . ? 
C7 Zr1 C3 94.3(5) . . ? 
N1 Zr1 C9 92.6(3) . . ? 
Cl1 Zr1 C9 84.5(4) . . ? 
C7 Zr1 C9 53.5(4) . . ? 
C3 Zr1 C9 146.7(6) . . ? 
N1 Zr1 C4 87.7(3) . . ? 
Cl1 Zr1 C4 98.1(5) . . ? 
C7 Zr1 C4 123.9(5) . . ? 
C3 Zr1 C4 30.5(4) . . ? 
C9 Zr1 C4 177.3(6) . . ? 
N1 Zr1 C8 85.3(3) . . ? 
Cl1 Zr1 C8 115.7(3) . . ? 
C7 Zr1 C8 31.0(3) . . ? 
C3 Zr1 C8 116.2(5) . . ? 
C9 Zr1 C8 31.4(4) . . ? 
C4 Zr1 C8 146.0(6) . . ? 
N1 Zr1 C2 118.8(6) . . ? 
Cl1 Zr1 C2 129.1(6) . . ? 
C7 Zr1 C2 73.6(6) . . ? 
C3 Zr1 C2 31.8(5) . . ? 
C9 Zr1 C2 125.0(6) . . ? 
C4 Zr1 C2 52.7(6) . . ? 
C8 Zr1 C2 103.0(6) . . ? 
N1 Zr1 C1 137.7(4) . . ? 
Cl1 Zr1 C1 97.4(7) . . ? 
C7 Zr1 C1 92.1(6) . . ? 
C3 Zr1 C1 50.6(6) . . ? 
C9 Zr1 C1 128.3(4) . . ? 
C4 Zr1 C1 50.8(5) . . ? 
C8 Zr1 C1 122.7(6) . . ? 
C2 Zr1 C1 31.9(6) . . ? 
N1 Zr1 C5 114.6(5) . . ? 
Cl1 Zr1 C5 78.5(4) . . ? 
C7 Zr1 C5 124.1(6) . . ? 
C3 Zr1 C5 52.5(5) . . ? 
C9 Zr1 C5 149.3(5) . . ? 
C4 Zr1 C5 31.8(4) . . ? 
C8 Zr1 C5 154.9(6) . . ? 
C2 Zr1 C5 54.8(7) . . ? 
C1 Zr1 C5 32.2(6) . . ? 
N1 Zr1 C10 125.1(4) . . ? 
Cl1 Zr1 C10 77.1(4) . . ? 
C7 Zr1 C10 54.1(5) . . ? 
C3 Zr1 C10 136.6(6) . . ? 
C9 Zr1 C10 33.0(4) . . ? 
C4 Zr1 C10 147.0(5) . . ? 
C8 Zr1 C10 52.4(4) . . ? 
C2 Zr1 C10 105.1(6) . . ? 
C1 Zr1 C10 96.9(5) . . ? 
C5 Zr1 C10 117.2(6) . . ? 
N1 Zr1 C6 136.3(3) . . ? 
Cl1 Zr1 C6 104.1(4) . . ? 
C7 Zr1 C6 32.5(4) . . ? 
C3 Zr1 C6 105.6(5) . . ? 
C9 Zr1 C6 52.8(4) . . ? 
C4 Zr1 C6 125.6(5) . . ? 
C8 Zr1 C6 51.1(4) . . ? 
C2 Zr1 C6 75.2(6) . . ? 
C1 Zr1 C6 77.2(5) . . ? 
C5 Zr1 C6 107.0(6) . . ? 
C10 Zr1 C6 31.8(4) . . ? 
N1 P1 C19 109.3(3) . . ? 
N1 P1 C14 110.5(3) . . ? 
C19 P1 C14 111.7(5) . . ? 
N1 P1 C18 110.6(4) . . ? 
C19 P1 C18 108.1(5) . . ? 
C14 P1 C18 106.5(4) . . ? 
P1 N1 Zr1 171.9(3) . . ? 
C2 C1 C5 112.7(16) . . ? 
C2 C1 Zr1 73.5(8) . . ? 
C5 C1 Zr1 73.9(7) . . ? 
C3 C2 C1 102.4(18) . . ? 
C3 C2 Zr1 73.4(7) . . ? 
C1 C2 Zr1 74.7(8) . . ? 
C4 C3 C2 111.7(17) . . ? 
C4 C3 Zr1 75.2(6) . . ? 
C2 C3 Zr1 74.8(7) . . ? 
C3 C4 C5 111.1(15) . . ? 
C3 C4 Zr1 74.3(6) . . ? 
C5 C4 Zr1 75.0(6) . . ? 
C4 C5 C1 101.9(15) . . ? 
C4 C5 Zr1 73.2(6) . . ? 
C1 C5 Zr1 73.8(7) . . ? 
C10 C6 C7 109.4(11) . . ? 
C10 C6 Zr1 73.8(6) . . ? 
C7 C6 Zr1 71.1(6) . . ? 
C8 C7 C6 105.3(12) . . ? 
C8 C7 Zr1 75.3(7) . . ? 
C6 C7 Zr1 76.4(6) . . ? 
C7 C8 C9 113.3(11) . . ? 
C7 C8 Zr1 73.7(6) . . ? 
C9 C8 Zr1 74.1(6) . . ? 
C8 C9 C10 106.3(12) . . ? 
C8 C9 Zr1 74.5(5) . . ? 
C10 C9 Zr1 75.3(5) . . ? 
C6 C10 C9 105.2(12) . . ? 
C6 C10 Zr1 74.5(6) . . ? 
C9 C10 Zr1 71.7(5) . . ? 
C12 C14 C13 106.4(8) . . ? 
C12 C14 C11 114.0(11) . . ? 
C13 C14 C11 103.1(10) . . ? 
C12 C14 P1 112.8(9) . . ? 
C13 C14 P1 107.9(6) . . ? 
C11 C14 P1 111.9(7) . . ? 
C17 C18 C15 112.3(9) . . ? 
C17 C18 C16 107.6(9) . . ? 
C15 C18 C16 105.6(12) . . ? 
C17 C18 P1 110.4(8) . . ? 
C15 C18 P1 114.6(7) . . ? 
C16 C18 P1 105.7(7) . . ? 
C20 C19 C21 104.0(7) . . ? 
C20 C19 C22 113.8(9) . . ? 
C21 C19 C22 105.8(9) . . ? 
C20 C19 P1 110.8(8) . . ? 
C21 C19 P1 107.4(6) . . ? 
C22 C19 P1 114.1(6) . . ? 
_diffrn_measured_fraction_theta_max 0.995 
_diffrn_reflns_theta_full 23.20 
_diffrn_measured_fraction_theta_full 0.995 
_refine_diff_density_max 0.975 
_refine_diff_density_min -0.695 
_refine_diff_density_rms 0.077 
#===end

data_CpZr(NPt-Bu3)Bn2
_chemical_formula_sum 
'C31 H46 N P Zr' 
_chemical_formula_weight 554.88 
loop_ 
_atom_type_symbol 
_atom_type_description 
_atom_type_scat_dispersion_real 
_atom_type_scat_dispersion_imag 
_atom_type_scat_source 
'C' 'C' 0.0033 0.0016 
'International Tables Vol C Tables 4.2.6.8 and 6.1.1.4' 
'H' 'H' 0.0000 0.0000 
'International Tables Vol C Tables 4.2.6.8 and 6.1.1.4' 
'N' 'N' 0.0061 0.0033 
'International Tables Vol C Tables 4.2.6.8 and 6.1.1.4' 
'P' 'P' 0.1023 0.0942 
'International Tables Vol C Tables 4.2.6.8 and 6.1.1.4' 
'Zr' 'Zr' -2.9673 0.5597 
'International Tables Vol C Tables 4.2.6.8 and 6.1.1.4' 
_symmetry_cell_setting orthorhombic 
_symmetry_space_group_name_H-M P2(1)2(1)2(1)
loop_ 
_symmetry_equiv_pos_as_xyz 
'x, y, z' 
'-x+1/2, -y, z+1/2' 
'-x, y+1/2, -z+1/2' 
'x+1/2, -y+1/2, -z' 
_cell_length_a 11.354(6) 
_cell_length_b 15.765(8) 
_cell_length_c 16.780(9) 
_cell_angle_alpha 90.00 
_cell_angle_beta 90.00 
_cell_angle_gamma 90.00 
_cell_volume 3004(3) 
_cell_formula_units_Z 4 
_cell_measurement_temperature 293(2) 
_cell_measurement_theta_min 2.0
_cell_measurement_theta_max 25.0
_exptl_crystal_size_max 0.24 
_exptl_crystal_size_mid 0.22
_exptl_crystal_size_min 0.18
_exptl_crystal_density_diffrn 1.227 
_exptl_crystal_density_method 'not measured' 
_exptl_crystal_F_000 1176 
_exptl_absorpt_coefficient_mu 0.437 
_exptl_absorpt_correction_type sadabs
_exptl_absorpt_correction_T_min 0.099685 
_exptl_absorpt_correction_T_max 0.145063 
_diffrn_ambient_temperature 293(2) 
_diffrn_radiation_wavelength 0.71073 
_diffrn_radiation_type MoK\a 
_diffrn_radiation_source 'fine-focus sealed tube' 
_diffrn_radiation_monochromator graphite 
_diffrn_reflns_number 12830 
_diffrn_reflns_av_R_equivalents 0.0154 
_diffrn_reflns_av_sigmaI/netI 0.0145 
_diffrn_reflns_limit_h_min -11 
_diffrn_reflns_limit_h_max 12 
_diffrn_reflns_limit_k_min -15 
_diffrn_reflns_limit_k_max 17 
_diffrn_reflns_limit_l_min -18 
_diffrn_reflns_limit_l_max 15 
_diffrn_reflns_theta_min 2.17 
_diffrn_reflns_theta_max 23.19 
_reflns_number_total 4279 
_reflns_number_gt 4067 
_reflns_threshold_expression >2sigma(I) 
_computing_structure_solution 'SHELXS-97 (Sheldrick, 1990)' 
_computing_structure_refinement 'SHELXL-97 (Sheldrick, 1997)' 
_refine_special_details 
; 
Refinement of F^2^ against ALL reflections. The weighted R-factor wR and 
goodness of fit S are based on F^2^, conventional R-factors R are based 
on F, with F set to zero for negative F^2^. The threshold expression of 
F^2^ > 2sigma(F^2^) is used only for calculating R-factors(gt) etc. and is 
not relevant to the choice of reflections for refinement. R-factors based 
on F^2^ are statistically about twice as large as those based on F, and R- 
factors based on ALL data will be even larger. 
; 
_refine_ls_structure_factor_coef Fsqd 
_refine_ls_matrix_type full 
_refine_ls_weighting_scheme calc 
_refine_ls_weighting_details 
'calc w=1/[\s^2^(Fo^2^)+(0.0386P)^2^+0.2592P] where P=(Fo^2^+2Fc^2^)/3' 
_atom_sites_solution_primary direct 
_atom_sites_solution_secondary difmap 
_atom_sites_solution_hydrogens geom 
_refine_ls_hydrogen_treatment mixed 
_refine_ls_extinction_method none 
_refine_ls_abs_structure_details 
'Flack H D (1983), Acta Cryst. A39, 876-881' 
_refine_ls_abs_structure_Flack 0.01(3) 
_refine_ls_number_reflns 4279 
_refine_ls_number_parameters 307 
_refine_ls_number_restraints 0 
_refine_ls_R_factor_all 0.0239 
_refine_ls_R_factor_gt 0.0217 
_refine_ls_wR_factor_ref 0.0570 
_refine_ls_wR_factor_gt 0.0560 
_refine_ls_goodness_of_fit_ref 1.031 
_refine_ls_restrained_S_all 1.031 
_refine_ls_shift/su_max 0.012 
_refine_ls_shift/su_mean 0.002 
loop_ 
_atom_site_label 
_atom_site_type_symbol 
_atom_site_fract_x 
_atom_site_fract_y 
_atom_site_fract_z 
_atom_site_U_iso_or_equiv 
_atom_site_adp_type 
_atom_site_occupancy 
_atom_site_symmetry_multiplicity 
_atom_site_calc_flag 
_atom_site_refinement_flags 
_atom_site_disorder_assembly 
_atom_site_disorder_group 
Zr1 Zr 0.131421(18) 0.652241(13) 0.721832(12) 0.04404(8) Uani 1 1 d . . . 
P1 P 0.37118(5) 0.50943(3) 0.72821(3) 0.04451(13) Uani 1 1 d . . . 
C19 C 0.2159(2) 0.80699(16) 0.84333(15) 0.0510(6) Uani 1 1 d . . . 
C10 C 0.5187(2) 0.56288(17) 0.70952(18) 0.0591(7) Uani 1 1 d . . . 
C16 C 0.4876(3) 0.4007(3) 0.8442(2) 0.0984(13) Uani 1 1 d . . . 
H16A H 0.4828 0.3741 0.8956 0.148 Uiso 1 1 calc R . . 
H16B H 0.5547 0.4378 0.8429 0.148 Uiso 1 1 calc R . . 
H16C H 0.4958 0.3580 0.8038 0.148 Uiso 1 1 calc R . . 
C24 C 0.1409(3) 0.86699(17) 0.87837(18) 0.0730(8) Uani 1 1 d . . . 
H24A H 0.0846 0.8944 0.8475 0.088 Uiso 1 1 calc R . . 
C22 C 0.2338(5) 0.8463(4) 1.0074(2) 0.1141(14) Uani 1 1 d . . . 
H22A H 0.2398 0.8588 1.0614 0.137 Uiso 1 1 calc R . . 
C6 C 0.3399(2) 0.43027(17) 0.64546(17) 0.0623(7) Uani 1 1 d . . . 
C26 C 0.1069(3) 0.7225(2) 0.57083(15) 0.0722(9) Uani 1 1 d . . . 
C13 C 0.6180(3) 0.50278(19) 0.6820(2) 0.0783(9) Uani 1 1 d . . . 
H13A H 0.6888 0.5348 0.6735 0.117 Uiso 1 1 calc R . . 
H13B H 0.5953 0.4755 0.6332 0.117 Uiso 1 1 calc R . . 
H13C H 0.6317 0.4606 0.7222 0.117 Uiso 1 1 calc R . . 
C15 C 0.2681(3) 0.3936(3) 0.8357(3) 0.1001(13) Uani 1 1 d . . . 
H15A H 0.2695 0.3661 0.8867 0.150 Uiso 1 1 calc R . . 
H15B H 0.2718 0.3516 0.7943 0.150 Uiso 1 1 calc R . . 
H15C H 0.1967 0.4257 0.8304 0.150 Uiso 1 1 calc R . . 
C20 C 0.2969(3) 0.76931(19) 0.89396(16) 0.0652(7) Uani 1 1 d . . . 
H20A H 0.3473 0.7285 0.8730 0.078 Uiso 1 1 calc R . . 
C14 C 0.3737(3) 0.45298(18) 0.82878(16) 0.0694(7) Uani 1 1 d . . . 
C9 C 0.4089(3) 0.3458(2) 0.6523(2) 0.0905(10) Uani 1 1 d . . . 
H9A H 0.3886 0.3096 0.6083 0.136 Uiso 1 1 calc R . . 
H9B H 0.3888 0.3182 0.7014 0.136 Uiso 1 1 calc R . . 
H9C H 0.4919 0.3572 0.6513 0.136 Uiso 1 1 calc R . . 
C25 C 0.0747(3) 0.6343(2) 0.58915(18) 0.0871(11) Uani 1 1 d . . . 
H25A H 0.1217 0.5928 0.5607 0.105 Uiso 1 1 calc R . . 
H25B H -0.0087 0.6227 0.5827 0.105 Uiso 1 1 calc R . . 
C23 C 0.1506(4) 0.8862(2) 0.9610(3) 0.1066(14) Uani 1 1 d . . . 
H23A H 0.1003 0.9259 0.9837 0.128 Uiso 1 1 calc R . . 
C30 C 0.0544(5) 0.8709(3) 0.5698(2) 0.1005(13) Uani 1 1 d . . . 
H30A H -0.0029 0.9126 0.5753 0.121 Uiso 1 1 calc R . . 
C27 C 0.2207(3) 0.7446(3) 0.5534(2) 0.0898(11) Uani 1 1 d . . . 
H27A H 0.2778 0.7026 0.5481 0.108 Uiso 1 1 calc R . . 
C31 C 0.0252(3) 0.7895(2) 0.57869(18) 0.0787(9) Uani 1 1 d . . . 
H31A H -0.0527 0.7763 0.5906 0.094 Uiso 1 1 calc R . . 
C29 C 0.1695(6) 0.8938(3) 0.5524(3) 0.1213(18) Uani 1 1 d . . . 
H29A H 0.1913 0.9503 0.5467 0.146 Uiso 1 1 calc R . . 
C17 C 0.3591(4) 0.5207(2) 0.89426(16) 0.0912(11) Uani 1 1 d . . . 
H17A H 0.3589 0.4937 0.9456 0.137 Uiso 1 1 calc R . . 
H17B H 0.2861 0.5502 0.8866 0.137 Uiso 1 1 calc R . . 
H17C H 0.4232 0.5602 0.8914 0.137 Uiso 1 1 calc R . . 
C28 C 0.2511(4) 0.8285(5) 0.5437(2) 0.1189(18) Uani 1 1 d . . . 
H28A H 0.3286 0.8420 0.5309 0.143 Uiso 1 1 calc R . . 
N1 N 0.26982(16) 0.57921(12) 0.72833(13) 0.0481(5) Uani 1 1 d . . . 
C12 C 0.5619(3) 0.6079(2) 0.7865(2) 0.0873(10) Uani 1 1 d . . . 
H12A H 0.6364 0.6346 0.7765 0.131 Uiso 1 1 calc R . . 
H12B H 0.5705 0.5669 0.8284 0.131 Uiso 1 1 calc R . . 
H12C H 0.5054 0.6500 0.8022 0.131 Uiso 1 1 calc R . . 
C8 C 0.3679(3) 0.4704(2) 0.56417(16) 0.0820(8) Uani 1 1 d . . . 
H8A H 0.3519 0.4301 0.5226 0.123 Uiso 1 1 calc R . . 
H8B H 0.4495 0.4863 0.5625 0.123 Uiso 1 1 calc R . . 
H8C H 0.3198 0.5198 0.5566 0.123 Uiso 1 1 calc R . . 
C18 C 0.2078(3) 0.78397(16) 0.75784(14) 0.0576(7) Uani 1 1 d . . . 
H18A H 0.2864 0.7879 0.7356 0.069 Uiso 1 1 calc R . . 
H18B H 0.1604 0.8270 0.7318 0.069 Uiso 1 1 calc R . . 
C11 C 0.4999(3) 0.63339(19) 0.6470(2) 0.0778(9) Uani 1 1 d . . . 
H11A H 0.5736 0.6609 0.6362 0.117 Uiso 1 1 calc R . . 
H11B H 0.4447 0.6742 0.6671 0.117 Uiso 1 1 calc R . . 
H11C H 0.4697 0.6089 0.5987 0.117 Uiso 1 1 calc R . . 
C5 C 0.0259(4) 0.6347(6) 0.8504(3) 0.148(3) Uani 1 1 d . . . 
H5A H 0.0623 0.6379 0.9033 0.178 Uiso 1 1 calc R . . 
C4 C -0.0347(4) 0.6975(3) 0.8151(3) 0.0991(14) Uani 1 1 d . . . 
H4A H -0.0455 0.7547 0.8369 0.119 Uiso 1 1 calc R . . 
C3 C -0.0921(3) 0.6658(3) 0.7527(3) 0.1029(13) Uani 1 1 d . . . 
H3A H -0.1511 0.6952 0.7202 0.123 Uiso 1 1 calc R . . 
C21 C 0.3069(4) 0.7889(3) 0.9736(2) 0.0942(11) Uani 1 1 d . . . 
H21A H 0.3643 0.7625 1.0045 0.113 Uiso 1 1 calc R . . 
C7 C 0.2060(3) 0.4114(2) 0.6447(2) 0.0827(10) Uani 1 1 d . . . 
H7A H 0.1885 0.3718 0.6029 0.124 Uiso 1 1 calc R . . 
H7B H 0.1634 0.4631 0.6357 0.124 Uiso 1 1 calc R . . 
H7C H 0.1831 0.3877 0.6951 0.124 Uiso 1 1 calc R . . 
C2 C -0.0648(4) 0.5809(4) 0.7499(4) 0.141(3) Uani 1 1 d . . . 
H2A H -0.1032 0.5386 0.7159 0.169 Uiso 1 1 calc R . . 
C1 C 0.0080(6) 0.5643(4) 0.8097(7) 0.201(5) Uani 1 1 d . . . 
H1A H 0.0287 0.5073 0.8283 0.241 Uiso 1 1 calc R . . 
loop_ 
_atom_site_aniso_label 
_atom_site_aniso_U_11 
_atom_site_aniso_U_22 
_atom_site_aniso_U_33 
_atom_site_aniso_U_23 
_atom_site_aniso_U_13 
_atom_site_aniso_U_12 
Zr1 0.03670(12) 0.04192(11) 0.05349(12) -0.00427(10) -0.00081(11) 0.00255(11) 
P1 0.0366(3) 0.0445(3) 0.0524(3) -0.0001(3) 0.0009(4) 0.0035(3) 
C19 0.0563(15) 0.0426(13) 0.0540(13) -0.0018(11) 0.0069(12) -0.0095(12) 
C10 0.0364(13) 0.0602(16) 0.0806(18) -0.0132(15) 0.0044(13) -0.0010(11) 
C16 0.088(3) 0.112(3) 0.095(3) 0.032(2) -0.008(2) 0.039(2) 
C24 0.078(2) 0.0551(17) 0.0863(18) -0.0151(14) 0.0075(18) 0.0008(17) 
C22 0.147(4) 0.136(4) 0.0596(19) -0.011(3) 0.006(2) -0.038(4) 
C6 0.0560(17) 0.0506(15) 0.0802(18) -0.0160(13) -0.0052(13) 0.0024(12) 
C26 0.072(2) 0.098(2) 0.0472(14) -0.0168(14) -0.0202(14) 0.0269(18) 
C13 0.0419(15) 0.082(2) 0.111(2) -0.0188(17) 0.0112(17) 0.0038(15) 
C15 0.088(2) 0.093(3) 0.119(3) 0.048(2) 0.023(2) 0.010(2) 
C20 0.0644(18) 0.0688(18) 0.0623(16) -0.0017(14) 0.0007(14) -0.0104(15) 
C14 0.0641(17) 0.0760(18) 0.0680(16) 0.0222(14) 0.0025(17) 0.0165(18) 
C9 0.090(2) 0.0556(17) 0.126(3) -0.024(2) -0.011(2) 0.0195(18) 
C25 0.099(3) 0.087(3) 0.075(2) -0.0170(17) -0.0297(18) 0.0210(19) 
C23 0.114(3) 0.094(3) 0.112(3) -0.052(2) 0.051(3) -0.013(2) 
C30 0.142(4) 0.076(3) 0.083(2) -0.0035(19) -0.006(3) 0.021(3) 
C27 0.071(2) 0.129(4) 0.0696(19) -0.017(2) -0.0123(17) 0.015(2) 
C31 0.076(2) 0.093(3) 0.0680(19) -0.0053(17) -0.0099(16) 0.0277(19) 
C29 0.183(6) 0.102(3) 0.078(3) 0.000(2) -0.015(3) -0.036(4) 
C17 0.098(3) 0.124(3) 0.0520(15) 0.0119(16) 0.0067(19) 0.035(3) 
C28 0.088(3) 0.196(6) 0.072(2) -0.015(3) -0.008(2) -0.031(4) 
N1 0.0411(10) 0.0490(11) 0.0540(11) 0.0022(10) 0.0020(10) 0.0028(8) 
C12 0.0591(18) 0.092(2) 0.111(3) -0.035(2) -0.0060(19) -0.0072(16) 
C8 0.090(2) 0.094(2) 0.0614(16) -0.0201(15) -0.0047(19) 0.008(2) 
C18 0.0704(17) 0.0481(14) 0.0542(14) -0.0026(11) 0.0024(13) -0.0096(13) 
C11 0.0622(18) 0.067(2) 0.105(2) 0.0048(17) 0.0217(17) -0.0100(14) 
C5 0.056(2) 0.299(9) 0.089(3) 0.089(5) 0.029(2) 0.025(4) 
C4 0.075(2) 0.088(3) 0.135(3) -0.043(3) 0.056(2) -0.026(2) 
C3 0.0386(16) 0.133(4) 0.137(3) 0.025(3) 0.0130(18) 0.0128(19) 
C21 0.106(3) 0.107(3) 0.070(2) 0.010(2) -0.016(2) -0.031(2) 
C7 0.0603(19) 0.0651(19) 0.123(3) -0.0188(18) -0.0205(19) -0.0082(15) 
C2 0.082(3) 0.110(4) 0.232(7) -0.080(4) 0.067(4) -0.049(3) 
C1 0.120(5) 0.104(4) 0.378(13) 0.132(6) 0.154(7) 0.052(4) 
_geom_special_details 
; 
All esds (except the esd in the dihedral angle between two l.s. planes) 
are estimated using the full covariance matrix. The cell esds are taken 
into account individually in the estimation of esds in distances, angles 
and torsion angles; correlations between esds in cell parameters are only 
used when they are defined by crystal symmetry. An approximate (isotropic) 
treatment of cell esds is used for estimating esds involving l.s. planes. 
; 
loop_ 
_geom_bond_atom_site_label_1 
_geom_bond_atom_site_label_2 
_geom_bond_distance 
_geom_bond_site_symmetry_2 
_geom_bond_publ_flag 
Zr1 N1 1.951(2) . ? 
Zr1 C18 2.330(3) . ? 
Zr1 C25 2.335(3) . ? 
Zr1 C1 2.462(5) . ? 
Zr1 C5 2.484(4) . ? 
Zr1 C2 2.540(4) . ? 
Zr1 C4 2.553(3) . ? 
Zr1 C3 2.599(3) . ? 
Zr1 C26 2.779(3) . ? 
P1 N1 1.592(2) . ? 
P1 C6 1.900(3) . ? 
P1 C10 1.901(3) . ? 
P1 C14 1.908(3) . ? 
C19 C20 1.386(4) . ? 
C19 C24 1.402(4) . ? 
C19 C18 1.482(4) . ? 
C10 C13 1.544(4) . ? 
C10 C11 1.544(4) . ? 
C10 C12 1.553(4) . ? 
C16 C14 1.556(4) . ? 
C24 C23 1.423(5) . ? 
C22 C21 1.352(6) . ? 
C22 C23 1.377(6) . ? 
C6 C8 1.537(4) . ? 
C6 C9 1.549(4) . ? 
C6 C7 1.550(4) . ? 
C26 C27 1.370(5) . ? 
C26 C31 1.413(4) . ? 
C26 C25 1.470(5) . ? 
C15 C14 1.525(5) . ? 
C20 C21 1.377(5) . ? 
C14 C17 1.541(4) . ? 
C30 C31 1.333(6) . ? 
C30 C29 1.388(7) . ? 
C27 C28 1.377(7) . ? 
C29 C28 1.392(7) . ? 
C5 C1 1.319(10) . ? 
C5 C4 1.343(7) . ? 
C4 C3 1.330(5) . ? 
C3 C2 1.374(7) . ? 
C2 C1 1.327(10) . ? 
loop_ 
_geom_angle_atom_site_label_1 
_geom_angle_atom_site_label_2 
_geom_angle_atom_site_label_3 
_geom_angle 
_geom_angle_site_symmetry_1 
_geom_angle_site_symmetry_3 
_geom_angle_publ_flag 
N1 Zr1 C18 102.23(10) . . ? 
N1 Zr1 C25 101.78(11) . . ? 
C18 Zr1 C25 117.24(11) . . ? 
N1 Zr1 C1 95.32(15) . . ? 
C18 Zr1 C1 123.9(3) . . ? 
C25 Zr1 C1 110.2(3) . . ? 
N1 Zr1 C5 105.92(16) . . ? 
C18 Zr1 C5 93.1(2) . . ? 
C25 Zr1 C5 132.99(17) . . ? 
C1 Zr1 C5 30.9(2) . . ? 
N1 Zr1 C2 115.79(18) . . ? 
C18 Zr1 C2 132.28(13) . . ? 
C25 Zr1 C2 83.17(19) . . ? 
C1 Zr1 C2 30.7(2) . . ? 
C5 Zr1 C2 50.7(2) . . ? 
N1 Zr1 C4 136.53(15) . . ? 
C18 Zr1 C4 82.35(11) . . ? 
C25 Zr1 C4 114.49(16) . . ? 
C1 Zr1 C4 50.90(16) . . ? 
C5 Zr1 C4 30.90(16) . . ? 
C2 Zr1 C4 50.34(13) . . ? 
N1 Zr1 C3 145.47(12) . . ? 
C18 Zr1 C3 103.77(14) . . ? 
C25 Zr1 C3 86.02(15) . . ? 
C1 Zr1 C3 51.02(17) . . ? 
C5 Zr1 C3 50.56(14) . . ? 
C2 Zr1 C3 31.00(15) . . ? 
C4 Zr1 C3 29.91(13) . . ? 
N1 Zr1 C26 111.52(9) . . ? 
C18 Zr1 C26 85.32(9) . . ? 
C25 Zr1 C26 31.93(11) . . ? 
C1 Zr1 C26 135.5(3) . . ? 
C5 Zr1 C26 142.01(14) . . ? 
C2 Zr1 C26 104.9(2) . . ? 
C4 Zr1 C26 111.94(15) . . ? 
C3 Zr1 C26 92.94(11) . . ? 
N1 P1 C6 108.65(12) . . ? 
N1 P1 C10 109.32(12) . . ? 
C6 P1 C10 109.58(12) . . ? 
N1 P1 C14 109.38(12) . . ? 
C6 P1 C14 110.04(14) . . ? 
C10 P1 C14 109.85(14) . . ? 
C20 C19 C24 115.8(3) . . ? 
C20 C19 C18 122.0(2) . . ? 
C24 C19 C18 122.2(3) . . ? 
C13 C10 C11 109.9(2) . . ? 
C13 C10 C12 107.3(2) . . ? 
C11 C10 C12 106.3(3) . . ? 
C13 C10 P1 114.90(19) . . ? 
C11 C10 P1 108.04(19) . . ? 
C12 C10 P1 110.1(2) . . ? 
C19 C24 C23 120.4(3) . . ? 
C21 C22 C23 119.4(3) . . ? 
C8 C6 C9 108.3(3) . . ? 
C8 C6 C7 105.9(3) . . ? 
C9 C6 C7 109.4(3) . . ? 
C8 C6 P1 109.9(2) . . ? 
C9 C6 P1 114.6(2) . . ? 
C7 C6 P1 108.4(2) . . ? 
C27 C26 C31 116.7(4) . . ? 
C27 C26 C25 121.3(3) . . ? 
C31 C26 C25 121.6(3) . . ? 
C27 C26 Zr1 101.6(2) . . ? 
C31 C26 Zr1 106.20(19) . . ? 
C25 C26 Zr1 57.14(15) . . ? 
C21 C20 C19 123.7(3) . . ? 
C15 C14 C17 106.7(3) . . ? 
C15 C14 C16 108.4(3) . . ? 
C17 C14 C16 109.7(3) . . ? 
C15 C14 P1 110.0(2) . . ? 
C17 C14 P1 107.83(19) . . ? 
C16 C14 P1 114.0(2) . . ? 
C26 C25 Zr1 90.93(18) . . ? 
C22 C23 C24 120.4(4) . . ? 
C31 C30 C29 120.5(5) . . ? 
C26 C27 C28 120.4(4) . . ? 
C30 C31 C26 123.1(4) . . ? 
C28 C29 C30 117.2(5) . . ? 
C27 C28 C29 122.1(4) . . ? 
P1 N1 Zr1 171.84(13) . . ? 
C19 C18 Zr1 119.49(17) . . ? 
C1 C5 C4 108.2(6) . . ? 
C1 C5 Zr1 73.6(3) . . ? 
C4 C5 Zr1 77.4(2) . . ? 
C3 C4 C5 108.8(4) . . ? 
C3 C4 Zr1 77.0(2) . . ? 
C5 C4 Zr1 71.7(2) . . ? 
C4 C3 C2 106.4(4) . . ? 
C4 C3 Zr1 73.13(19) . . ? 
C2 C3 Zr1 72.1(2) . . ? 
C22 C21 C20 120.4(4) . . ? 
C1 C2 C3 107.8(5) . . ? 
C1 C2 Zr1 71.4(3) . . ? 
C3 C2 Zr1 76.9(2) . . ? 
C5 C1 C2 108.8(5) . . ? 
C5 C1 Zr1 75.5(3) . . ? 
C2 C1 Zr1 77.9(3) . . ? 
_diffrn_measured_fraction_theta_max 0.997 
_diffrn_reflns_theta_full 23.19 
_diffrn_measured_fraction_theta_full 0.997 
_refine_diff_density_max 0.162 
_refine_diff_density_min -0.140 
_refine_diff_density_rms 0.032 
#===end

data_ CpZr(NPt-Bu3)2Bn 
_audit_creation_method SHELXL-97 
_chemical_formula_sum 
'C36 H66 N2 P2 Zr' 
_chemical_formula_weight 680.07 
loop_ 
_atom_type_symbol 
_atom_type_description 
_atom_type_scat_dispersion_real 
_atom_type_scat_dispersion_imag 
_atom_type_scat_source 
'C' 'C' 0.0033 0.0016 
'International Tables Vol C Tables 4.2.6.8 and 6.1.1.4' 
'H' 'H' 0.0000 0.0000 
'International Tables Vol C Tables 4.2.6.8 and 6.1.1.4' 
'N' 'N' 0.0061 0.0033 
'International Tables Vol C Tables 4.2.6.8 and 6.1.1.4' 
'P' 'P' 0.1023 0.0942 
'International Tables Vol C Tables 4.2.6.8 and 6.1.1.4' 
'Zr' 'Zr' -2.9673 0.5597 
'International Tables Vol C Tables 4.2.6.8 and 6.1.1.4' 
_symmetry_cell_setting monoclinic 
_symmetry_space_group_name_H-M P2(1)/c 
loop_ 
_symmetry_equiv_pos_as_xyz 
'x, y, z' 
'-x, y+1/2, -z+1/2' 
'-x, -y, -z' 
'x, -y-1/2, z-1/2' 
_cell_length_a 10.759(6) 
_cell_length_b 19.554(12) 
_cell_length_c 19.429(12) 
_cell_angle_alpha 90.00 
_cell_angle_beta 103.548(12) 
_cell_angle_gamma 90.00 
_cell_volume 3974(4) 
_cell_formula_units_Z 4 
_cell_measurement_temperature 293(2) 
_cell_measurement_theta_min 2.0
_cell_measurement_theta_max 25.0
_exptl_crystal_size_max 0.29
_exptl_crystal_size_mid 0.26
_exptl_crystal_size_min 0.22
_exptl_crystal_density_diffrn 1.137 
_exptl_crystal_density_method 'not measured' 
_exptl_crystal_F_000 1464 
_exptl_absorpt_coefficient_mu 0.381 
_exptl_absorpt_correction_type sadabs
_exptl_absorpt_correction_T_min 0.771377 
_exptl_absorpt_correction_T_max 1.000000 
_diffrn_ambient_temperature 293(2) 
_diffrn_radiation_wavelength 0.71073 
_diffrn_radiation_type MoK\a 
_diffrn_radiation_source 'fine-focus sealed tube' 
_diffrn_radiation_monochromator graphite 
_diffrn_reflns_number 16934 
_diffrn_reflns_av_R_equivalents 0.0301 
_diffrn_reflns_av_sigmaI/netI 0.0441 
_diffrn_reflns_limit_h_min -11 
_diffrn_reflns_limit_h_max 10 
_diffrn_reflns_limit_k_min -16 
_diffrn_reflns_limit_k_max 21 
_diffrn_reflns_limit_l_min -21 
_diffrn_reflns_limit_l_max 20 
_diffrn_reflns_theta_min 2.16 
_diffrn_reflns_theta_max 23.37 
_reflns_number_total 5720 
_reflns_number_gt 3645 
_reflns_threshold_expression >2sigma(I) 
_computing_structure_solution 'SHELXS-97 (Sheldrick, 1990)' 
_computing_structure_refinement 'SHELXL-97 (Sheldrick, 1997)' 
_refine_special_details 
; 
Refinement of F^2^ against ALL reflections. The weighted R-factor wR and 
goodness of fit S are based on F^2^, conventional R-factors R are based 
on F, with F set to zero for negative F^2^. The threshold expression of 
F^2^ > 2sigma(F^2^) is used only for calculating R-factors(gt) etc. and is 
not relevant to the choice of reflections for refinement. R-factors based 
on F^2^ are statistically about twice as large as those based on F, and R- 
factors based on ALL data will be even larger. 
; 
_refine_ls_structure_factor_coef Fsqd 
_refine_ls_matrix_type full 
_refine_ls_weighting_scheme calc 
_refine_ls_weighting_details 
'calc w=1/[\s^2^(Fo^2^)+(0.0599P)^2^+0.0000P] where P=(Fo^2^+2Fc^2^)/3' 
_atom_sites_solution_primary direct 
_atom_sites_solution_secondary difmap 
_atom_sites_solution_hydrogens geom 
_refine_ls_hydrogen_treatment mixed 
_refine_ls_extinction_method none 
_refine_ls_number_reflns 5720 
_refine_ls_number_parameters 370 
_refine_ls_number_restraints 0 
_refine_ls_R_factor_all 0.0627 
_refine_ls_R_factor_gt 0.0339 
_refine_ls_wR_factor_ref 0.0927 
_refine_ls_wR_factor_gt 0.0850 
_refine_ls_goodness_of_fit_ref 0.872 
_refine_ls_restrained_S_all 0.872 
_refine_ls_shift/su_max 0.013 
_refine_ls_shift/su_mean 0.001 
loop_ 
_atom_site_label 
_atom_site_type_symbol 
_atom_site_fract_x 
_atom_site_fract_y 
_atom_site_fract_z 
_atom_site_U_iso_or_equiv 
_atom_site_adp_type 
_atom_site_occupancy 
_atom_site_symmetry_multiplicity 
_atom_site_calc_flag 
_atom_site_refinement_flags 
_atom_site_disorder_assembly 
_atom_site_disorder_group 
Zr1 Zr 0.16797(3) -0.001861(16) 0.295840(14) 0.03836(11) Uani 1 1 d . . . 
P1 P 0.25215(9) 0.14373(5) 0.40626(5) 0.0543(3) Uani 1 1 d . . . 
P2 P 0.33842(8) -0.01020(5) 0.15954(4) 0.0463(2) Uani 1 1 d . . . 
N1 N 0.2206(2) 0.08043(12) 0.35573(12) 0.0484(7) Uani 1 1 d . . . 
N2 N 0.2684(2) -0.00988(13) 0.22252(12) 0.0467(7) Uani 1 1 d . . . 
C1 C 0.2188(5) 0.1217(2) 0.4962(2) 0.0881(13) Uani 1 1 d . . . 
C2 C 0.3249(5) 0.0742(2) 0.5366(2) 0.1225(19) Uani 1 1 d . . . 
H2A H 0.3083 0.0627 0.5817 0.184 Uiso 1 1 calc R . . 
H2B H 0.4059 0.0970 0.5438 0.184 Uiso 1 1 calc R . . 
H2C H 0.3267 0.0332 0.5097 0.184 Uiso 1 1 calc R . . 
C3 C 0.0919(5) 0.0820(3) 0.4833(2) 0.128(2) Uani 1 1 d . . . 
H3A H 0.0736 0.0705 0.5279 0.192 Uiso 1 1 calc R . . 
H3B H 0.0987 0.0408 0.4575 0.192 Uiso 1 1 calc R . . 
H3C H 0.0242 0.1099 0.4565 0.192 Uiso 1 1 calc R . . 
C4 C 0.2080(5) 0.1855(3) 0.5439(2) 0.129(2) Uani 1 1 d . . . 
H4A H 0.1907 0.1703 0.5877 0.193 Uiso 1 1 calc R . . 
H4B H 0.1398 0.2145 0.5197 0.193 Uiso 1 1 calc R . . 
H4C H 0.2870 0.2105 0.5535 0.193 Uiso 1 1 calc R . . 
C5 C 0.1554(5) 0.2193(2) 0.3652(2) 0.1042(17) Uani 1 1 d . . . 
C6 C 0.1520(5) 0.2209(2) 0.2846(2) 0.135(2) Uani 1 1 d . . . 
H6A H 0.1023 0.2593 0.2631 0.203 Uiso 1 1 calc R . . 
H6B H 0.1142 0.1794 0.2628 0.203 Uiso 1 1 calc R . . 
H6C H 0.2376 0.2249 0.2783 0.203 Uiso 1 1 calc R . . 
C7 C 0.2020(5) 0.2905(2) 0.3979(3) 0.148(3) Uani 1 1 d . . . 
H7A H 0.1463 0.3257 0.3736 0.222 Uiso 1 1 calc R . . 
H7B H 0.2875 0.2988 0.3930 0.222 Uiso 1 1 calc R . . 
H7C H 0.2009 0.2909 0.4472 0.222 Uiso 1 1 calc R . . 
C8 C 0.0122(5) 0.2073(3) 0.3710(3) 0.165(3) Uani 1 1 d . . . 
H8A H -0.0396 0.2453 0.3502 0.248 Uiso 1 1 calc R . . 
H8B H 0.0099 0.2032 0.4199 0.248 Uiso 1 1 calc R . . 
H8C H -0.0202 0.1661 0.3464 0.248 Uiso 1 1 calc R . . 
C9 C 0.4296(4) 0.1655(2) 0.4219(2) 0.0779(12) Uani 1 1 d . . . 
C10 C 0.4825(4) 0.2144(2) 0.4855(2) 0.1031(16) Uani 1 1 d . . . 
H10A H 0.5718 0.2226 0.4892 0.155 Uiso 1 1 calc R . . 
H10B H 0.4712 0.1937 0.5285 0.155 Uiso 1 1 calc R . . 
H10C H 0.4369 0.2570 0.4780 0.155 Uiso 1 1 calc R . . 
C11 C 0.5069(4) 0.0982(2) 0.4319(2) 0.1026(15) Uani 1 1 d . . . 
H11A H 0.5963 0.1084 0.4394 0.154 Uiso 1 1 calc R . . 
H11B H 0.4806 0.0704 0.3903 0.154 Uiso 1 1 calc R . . 
H11C H 0.4918 0.0740 0.4722 0.154 Uiso 1 1 calc R . . 
C12 C 0.4546(5) 0.1992(3) 0.3540(3) 0.131(2) Uani 1 1 d . . . 
H12A H 0.5437 0.2101 0.3613 0.197 Uiso 1 1 calc R . . 
H12B H 0.4049 0.2403 0.3437 0.197 Uiso 1 1 calc R . . 
H12C H 0.4306 0.1681 0.3149 0.197 Uiso 1 1 calc R . . 
C13 C 0.3057(4) 0.0731(2) 0.10832(19) 0.0712(11) Uani 1 1 d . . . 
C14 C 0.3744(6) 0.1312(2) 0.1551(3) 0.147(2) Uani 1 1 d . . . 
H14A H 0.3582 0.1737 0.1298 0.221 Uiso 1 1 calc R . . 
H14B H 0.4648 0.1225 0.1673 0.221 Uiso 1 1 calc R . . 
H14C H 0.3434 0.1340 0.1975 0.221 Uiso 1 1 calc R . . 
C15 C 0.3477(5) 0.0756(3) 0.0381(3) 0.139(2) Uani 1 1 d . . . 
H15A H 0.3264 0.1194 0.0163 0.209 Uiso 1 1 calc R . . 
H15B H 0.3045 0.0404 0.0072 0.209 Uiso 1 1 calc R . . 
H15C H 0.4384 0.0686 0.0470 0.209 Uiso 1 1 calc R . . 
C16 C 0.1643(4) 0.0896(3) 0.0944(3) 0.123(2) Uani 1 1 d . . . 
H16A H 0.1475 0.1316 0.0685 0.185 Uiso 1 1 calc R . . 
H16B H 0.1400 0.0941 0.1387 0.185 Uiso 1 1 calc R . . 
H16C H 0.1159 0.0533 0.0673 0.185 Uiso 1 1 calc R . . 
C17 C 0.2789(3) -0.0843(2) 0.09631(17) 0.0595(10) Uani 1 1 d . . . 
C18 C 0.3587(5) -0.1000(3) 0.0414(2) 0.1208(19) Uani 1 1 d . . . 
H18A H 0.3213 -0.1379 0.0124 0.181 Uiso 1 1 calc R . . 
H18B H 0.4446 -0.1113 0.0656 0.181 Uiso 1 1 calc R . . 
H18C H 0.3596 -0.0605 0.0121 0.181 Uiso 1 1 calc R . . 
C19 C 0.1427(4) -0.0711(3) 0.0558(2) 0.128(2) Uani 1 1 d . . . 
H19A H 0.1136 -0.1087 0.0243 0.193 Uiso 1 1 calc R . . 
H19B H 0.1394 -0.0297 0.0289 0.193 Uiso 1 1 calc R . . 
H19C H 0.0887 -0.0667 0.0885 0.193 Uiso 1 1 calc R . . 
C20 C 0.2719(5) -0.1482(2) 0.1400(3) 0.1173(17) Uani 1 1 d . . . 
H20A H 0.2420 -0.1859 0.1090 0.176 Uiso 1 1 calc R . . 
H20B H 0.2139 -0.1404 0.1700 0.176 Uiso 1 1 calc R . . 
H20C H 0.3553 -0.1584 0.1687 0.176 Uiso 1 1 calc R . . 
C21 C 0.5174(3) -0.0198(2) 0.19581(18) 0.0623(10) Uani 1 1 d . . . 
C22 C 0.5582(4) 0.0278(3) 0.2588(2) 0.121(2) Uani 1 1 d . . . 
H22A H 0.6487 0.0236 0.2777 0.181 Uiso 1 1 calc R . . 
H22B H 0.5139 0.0156 0.2945 0.181 Uiso 1 1 calc R . . 
H22C H 0.5379 0.0741 0.2439 0.181 Uiso 1 1 calc R . . 
C23 C 0.5466(4) -0.0922(3) 0.2264(3) 0.126(2) Uani 1 1 d . . . 
H23A H 0.6371 -0.0971 0.2448 0.189 Uiso 1 1 calc R . . 
H23B H 0.5177 -0.1254 0.1897 0.189 Uiso 1 1 calc R . . 
H23C H 0.5033 -0.0993 0.2637 0.189 Uiso 1 1 calc R . . 
C24 C 0.6022(4) -0.0081(3) 0.1437(2) 0.1139(19) Uani 1 1 d . . . 
H24A H 0.6903 -0.0141 0.1677 0.171 Uiso 1 1 calc R . . 
H24B H 0.5895 0.0375 0.1251 0.171 Uiso 1 1 calc R . . 
H24C H 0.5801 -0.0404 0.1055 0.171 Uiso 1 1 calc R . . 
C25 C -0.0387(4) -0.0669(4) 0.3021(4) 0.115(2) Uani 1 1 d . . . 
H25A H -0.0430 -0.1040 0.3355 0.138 Uiso 1 1 calc R . . 
C26 C -0.0245(4) -0.0760(4) 0.2361(5) 0.123(3) Uani 1 1 d . . . 
H26A H -0.0212 -0.1200 0.2123 0.148 Uiso 1 1 calc R . . 
C27 C -0.0415(4) -0.0111(5) 0.2035(2) 0.111(2) Uani 1 1 d . . . 
H27A H -0.0546 -0.0018 0.1527 0.133 Uiso 1 1 calc R . . 
C28 C -0.0647(4) -0.0027(4) 0.3119(3) 0.0954(16) Uani 1 1 d . . . 
H28A H -0.0912 0.0150 0.3535 0.115 Uiso 1 1 calc R . . 
C29 C -0.0648(4) 0.0330(2) 0.2536(4) 0.0904(15) Uani 1 1 d . . . 
H29A H -0.0957 0.0801 0.2447 0.108 Uiso 1 1 calc R . . 
C30 C 0.2612(3) -0.08294(17) 0.37938(17) 0.0639(10) Uani 1 1 d . . . 
H30A H 0.3528 -0.0773 0.3861 0.077 Uiso 1 1 calc R . . 
H30B H 0.2411 -0.0689 0.4234 0.077 Uiso 1 1 calc R . . 
C31 C 0.2376(3) -0.15709(18) 0.37361(19) 0.0596(10) Uani 1 1 d . . . 
C32 C 0.2918(5) -0.1983(3) 0.3314(2) 0.0994(15) Uani 1 1 d . . . 
H32A H 0.3467 -0.1789 0.3064 0.119 Uiso 1 1 calc R . . 
C33 C 0.2666(9) -0.2695(4) 0.3247(3) 0.164(4) Uani 1 1 d . . . 
H33A H 0.3016 -0.2960 0.2942 0.197 Uiso 1 1 calc R . . 
C34 C 0.1931(10) -0.2975(4) 0.3623(4) 0.179(6) Uani 1 1 d . . . 
H34A H 0.1806 -0.3445 0.3602 0.215 Uiso 1 1 calc R . . 
C35 C 0.1355(6) -0.2596(3) 0.4036(4) 0.149(3) Uani 1 1 d . . . 
H35A H 0.0806 -0.2802 0.4279 0.179 Uiso 1 1 calc R . . 
C36 C 0.1583(4) -0.1901(2) 0.4098(3) 0.0966(15) Uani 1 1 d . . . 
H36A H 0.1191 -0.1647 0.4392 0.116 Uiso 1 1 calc R . . 
loop_ 
_atom_site_aniso_label 
_atom_site_aniso_U_11 
_atom_site_aniso_U_22 
_atom_site_aniso_U_33 
_atom_site_aniso_U_23 
_atom_site_aniso_U_13 
_atom_site_aniso_U_12 
Zr1 0.03510(17) 0.04005(17) 0.04016(17) -0.00264(15) 0.00924(11) -0.00290(17) 
P1 0.0662(6) 0.0414(5) 0.0512(5) -0.0066(4) 0.0053(4) 0.0023(5) 
P2 0.0387(4) 0.0625(6) 0.0378(4) 0.0003(4) 0.0092(3) 0.0010(5) 
N1 0.0527(16) 0.0427(15) 0.0483(16) -0.0040(12) 0.0088(13) 0.0012(13) 
N2 0.0419(14) 0.0575(17) 0.0414(14) -0.0025(12) 0.0111(12) 0.0033(13) 
C1 0.123(4) 0.085(3) 0.063(3) -0.023(2) 0.036(3) -0.015(3) 
C2 0.204(6) 0.093(4) 0.059(3) 0.016(3) 0.010(3) 0.000(4) 
C3 0.157(5) 0.143(5) 0.110(4) -0.054(3) 0.084(4) -0.070(4) 
C4 0.166(5) 0.133(4) 0.101(4) -0.065(3) 0.060(4) -0.030(4) 
C5 0.128(4) 0.055(3) 0.097(4) -0.020(2) -0.040(3) 0.034(3) 
C6 0.206(6) 0.071(3) 0.089(4) 0.009(3) -0.047(4) 0.028(3) 
C7 0.195(6) 0.052(3) 0.146(5) -0.029(3) -0.066(4) 0.042(3) 
C8 0.100(4) 0.143(5) 0.213(7) -0.081(5) -0.043(4) 0.070(4) 
C9 0.075(3) 0.079(3) 0.070(3) -0.016(2) -0.002(2) -0.017(2) 
C10 0.095(3) 0.096(3) 0.102(4) -0.036(3) -0.011(3) -0.024(3) 
C11 0.076(3) 0.114(4) 0.109(4) -0.035(3) 0.003(3) 0.010(3) 
C12 0.159(5) 0.135(5) 0.106(4) -0.023(4) 0.046(4) -0.081(4) 
C13 0.078(3) 0.080(3) 0.060(2) 0.024(2) 0.024(2) 0.013(2) 
C14 0.213(7) 0.075(3) 0.139(5) 0.011(3) 0.013(4) -0.019(4) 
C15 0.171(5) 0.160(5) 0.114(4) 0.075(4) 0.087(4) 0.058(4) 
C16 0.101(4) 0.121(4) 0.152(5) 0.070(4) 0.038(3) 0.050(3) 
C17 0.051(2) 0.079(3) 0.050(2) -0.0147(19) 0.0144(17) -0.004(2) 
C18 0.126(4) 0.162(5) 0.093(3) -0.069(3) 0.063(3) -0.042(4) 
C19 0.069(3) 0.170(5) 0.127(4) -0.069(4) -0.017(3) 0.001(3) 
C20 0.159(5) 0.082(3) 0.108(4) -0.024(3) 0.023(3) -0.024(3) 
C21 0.0368(18) 0.099(3) 0.052(2) -0.004(2) 0.0115(16) 0.0038(19) 
C22 0.051(3) 0.189(5) 0.112(4) -0.070(4) -0.003(2) -0.007(3) 
C23 0.062(3) 0.153(5) 0.147(5) 0.046(4) -0.006(3) 0.028(3) 
C24 0.049(2) 0.212(6) 0.087(3) -0.007(3) 0.028(2) 0.005(3) 
C25 0.048(3) 0.096(4) 0.196(8) 0.054(5) 0.020(4) -0.016(3) 
C26 0.044(3) 0.119(5) 0.206(7) -0.113(6) 0.028(4) -0.028(3) 
C27 0.035(2) 0.235(8) 0.054(3) 0.002(4) -0.0049(18) -0.038(4) 
C28 0.043(2) 0.170(6) 0.076(3) -0.014(4) 0.020(2) -0.003(4) 
C29 0.038(2) 0.080(3) 0.140(5) 0.014(4) -0.005(3) 0.002(2) 
C30 0.071(2) 0.059(2) 0.054(2) 0.0070(18) 0.0006(18) -0.005(2) 
C31 0.066(2) 0.051(2) 0.054(2) 0.0131(19) -0.0003(18) 0.004(2) 
C32 0.141(4) 0.089(4) 0.063(3) 0.008(2) 0.013(3) 0.043(3) 
C33 0.278(11) 0.101(6) 0.080(5) -0.018(4) -0.026(5) 0.083(6) 
C34 0.240(11) 0.068(5) 0.153(9) 0.001(5) -0.106(8) 0.015(5) 
C35 0.122(5) 0.091(5) 0.210(8) 0.079(5) -0.009(5) -0.026(4) 
C36 0.096(4) 0.069(3) 0.125(4) 0.034(3) 0.029(3) 0.004(3) 
_geom_special_details 
; 
All esds (except the esd in the dihedral angle between two l.s. planes) 
are estimated using the full covariance matrix. The cell esds are taken 
into account individually in the estimation of esds in distances, angles 
and torsion angles; correlations between esds in cell parameters are only 
used when they are defined by crystal symmetry. An approximate (isotropic) 
treatment of cell esds is used for estimating esds involving l.s. planes. 
; 
loop_ 
_geom_bond_atom_site_label_1 
_geom_bond_atom_site_label_2 
_geom_bond_distance 
_geom_bond_site_symmetry_2 
_geom_bond_publ_flag 
Zr1 N2 1.985(2) . ? 
Zr1 N1 1.989(3) . ? 
Zr1 C30 2.322(3) . ? 
Zr1 C29 2.540(4) . ? 
Zr1 C27 2.538(4) . ? 
Zr1 C26 2.572(4) . ? 
Zr1 C25 2.590(4) . ? 
Zr1 C28 2.595(4) . ? 
P1 N1 1.567(3) . ? 
P1 C5 1.874(4) . ? 
P1 C9 1.910(4) . ? 
P1 C1 1.913(4) . ? 
P2 N2 1.580(3) . ? 
P2 C21 1.898(3) . ? 
P2 C13 1.898(4) . ? 
P2 C17 1.910(4) . ? 
C1 C2 1.536(6) . ? 
C1 C3 1.540(6) . ? 
C1 C4 1.575(5) . ? 
C5 C6 1.558(6) . ? 
C5 C7 1.564(5) . ? 
C5 C8 1.588(7) . ? 
C9 C11 1.544(5) . ? 
C9 C12 1.554(5) . ? 
C9 C10 1.561(5) . ? 
C13 C16 1.517(5) . ? 
C13 C14 1.534(6) . ? 
C13 C15 1.534(5) . ? 
C17 C20 1.523(5) . ? 
C17 C19 1.515(5) . ? 
C17 C18 1.548(5) . ? 
C21 C22 1.517(5) . ? 
C21 C24 1.532(5) . ? 
C21 C23 1.540(6) . ? 
C25 C28 1.309(7) . ? 
C25 C26 1.340(7) . ? 
C26 C27 1.411(7) . ? 
C27 C29 1.369(7) . ? 
C28 C29 1.331(6) . ? 
C30 C31 1.472(5) . ? 
C31 C32 1.374(5) . ? 
C31 C36 1.386(5) . ? 
C32 C33 1.419(8) . ? 
C33 C34 1.314(11) . ? 
C34 C35 1.345(10) . ? 
C35 C36 1.381(7) . ? 
loop_ 
_geom_angle_atom_site_label_1 
_geom_angle_atom_site_label_2 
_geom_angle_atom_site_label_3 
_geom_angle 
_geom_angle_site_symmetry_1 
_geom_angle_site_symmetry_3 
_geom_angle_publ_flag 
N2 Zr1 N1 110.83(10) . . ? 
N2 Zr1 C30 103.24(12) . . ? 
N1 Zr1 C30 97.26(12) . . ? 
N2 Zr1 C29 116.8(2) . . ? 
N1 Zr1 C29 95.48(15) . . ? 
C30 Zr1 C29 129.87(17) . . ? 
N2 Zr1 C27 91.68(15) . . ? 
N1 Zr1 C27 123.7(2) . . ? 
C30 Zr1 C27 127.8(2) . . ? 
C29 Zr1 C27 31.28(16) . . ? 
N2 Zr1 C26 98.5(2) . . ? 
N1 Zr1 C26 144.01(14) . . ? 
C30 Zr1 C26 95.8(3) . . ? 
C29 Zr1 C26 51.44(17) . . ? 
C27 Zr1 C26 32.05(16) . . ? 
N2 Zr1 C25 127.8(2) . . ? 
N1 Zr1 C25 120.0(2) . . ? 
C30 Zr1 C25 82.35(15) . . ? 
C29 Zr1 C25 49.78(16) . . ? 
C27 Zr1 C25 50.80(18) . . ? 
C26 Zr1 C25 30.08(17) . . ? 
N2 Zr1 C28 142.05(13) . . ? 
N1 Zr1 C28 94.89(16) . . ? 
C30 Zr1 C28 100.50(19) . . ? 
C29 Zr1 C28 30.03(15) . . ? 
C27 Zr1 C28 50.40(15) . . ? 
C26 Zr1 C28 49.69(16) . . ? 
C25 Zr1 C28 29.25(15) . . ? 
N1 P1 C5 109.80(16) . . ? 
N1 P1 C9 109.72(16) . . ? 
C5 P1 C9 109.1(2) . . ? 
N1 P1 C1 109.54(16) . . ? 
C5 P1 C1 111.2(2) . . ? 
C9 P1 C1 107.4(2) . . ? 
N2 P2 C21 109.84(14) . . ? 
N2 P2 C13 109.83(15) . . ? 
C21 P2 C13 109.07(17) . . ? 
N2 P2 C17 110.63(15) . . ? 
C21 P2 C17 108.76(16) . . ? 
C13 P2 C17 108.68(18) . . ? 
P1 N1 Zr1 174.87(16) . . ? 
P2 N2 Zr1 173.84(16) . . ? 
C2 C1 C3 107.6(4) . . ? 
C2 C1 C4 109.0(4) . . ? 
C3 C1 C4 108.0(4) . . ? 
C2 C1 P1 109.1(3) . . ? 
C3 C1 P1 108.3(3) . . ? 
C4 C1 P1 114.5(3) . . ? 
C6 C5 C7 108.6(4) . . ? 
C6 C5 C8 106.2(4) . . ? 
C7 C5 C8 109.1(4) . . ? 
C6 C5 P1 108.9(3) . . ? 
C7 C5 P1 115.9(3) . . ? 
C8 C5 P1 107.7(4) . . ? 
C11 C9 C12 105.9(4) . . ? 
C11 C9 C10 109.7(3) . . ? 
C12 C9 C10 108.0(4) . . ? 
C11 C9 P1 108.6(3) . . ? 
C12 C9 P1 109.0(3) . . ? 
C10 C9 P1 115.3(3) . . ? 
C16 C13 C14 105.8(4) . . ? 
C16 C13 C15 109.1(4) . . ? 
C14 C13 C15 107.5(4) . . ? 
C16 C13 P2 109.3(3) . . ? 
C14 C13 P2 108.7(3) . . ? 
C15 C13 P2 115.9(3) . . ? 
C20 C17 C19 105.1(4) . . ? 
C20 C17 C18 109.2(4) . . ? 
C19 C17 C18 107.5(3) . . ? 
C20 C17 P2 108.4(2) . . ? 
C19 C17 P2 110.1(3) . . ? 
C18 C17 P2 115.9(3) . . ? 
C22 C21 C24 109.7(3) . . ? 
C22 C21 C23 105.0(4) . . ? 
C24 C21 C23 107.0(3) . . ? 
C22 C21 P2 108.4(2) . . ? 
C24 C21 P2 116.7(3) . . ? 
C23 C21 P2 109.4(3) . . ? 
C28 C25 C26 110.1(6) . . ? 
C28 C25 Zr1 75.6(3) . . ? 
C26 C25 Zr1 74.2(3) . . ? 
C25 C26 C27 106.2(5) . . ? 
C25 C26 Zr1 75.7(3) . . ? 
C27 C26 Zr1 72.6(3) . . ? 
C29 C27 C26 105.9(5) . . ? 
C29 C27 Zr1 74.4(2) . . ? 
C26 C27 Zr1 75.3(3) . . ? 
C25 C28 C29 109.7(5) . . ? 
C25 C28 Zr1 75.2(3) . . ? 
C29 C28 Zr1 72.7(2) . . ? 
C28 C29 C27 108.1(5) . . ? 
C28 C29 Zr1 77.3(2) . . ? 
C27 C29 Zr1 74.3(2) . . ? 
C31 C30 Zr1 125.5(2) . . ? 
C32 C31 C36 115.3(4) . . ? 
C32 C31 C30 122.3(4) . . ? 
C36 C31 C30 122.5(4) . . ? 
C31 C32 C33 122.2(6) . . ? 
C34 C33 C32 118.9(8) . . ? 
C33 C34 C35 121.7(9) . . ? 
C34 C35 C36 119.7(8) . . ? 
C35 C36 C31 122.2(5) . . ? 
_diffrn_measured_fraction_theta_max 0.991 
_diffrn_reflns_theta_full 23.37 
_diffrn_measured_fraction_theta_full 0.991 
_refine_diff_density_max 0.330 
_refine_diff_density_min -0.222 
_refine_diff_density_rms 0.042 
#===end


data_ Zr(NPt-Bu3)2(NEt2)2 
_chemical_formula_sum 
'C32 H72 N4 P2 Zr' 
_chemical_formula_weight 666.10 
loop_ 
_atom_type_symbol 
_atom_type_description 
_atom_type_scat_dispersion_real 
_atom_type_scat_dispersion_imag 
_atom_type_scat_source 
'C' 'C' 0.0033 0.0016 
'International Tables Vol C Tables 4.2.6.8 and 6.1.1.4' 
'H' 'H' 0.0000 0.0000 
'International Tables Vol C Tables 4.2.6.8 and 6.1.1.4' 
'N' 'N' 0.0061 0.0033 
'International Tables Vol C Tables 4.2.6.8 and 6.1.1.4' 
'P' 'P' 0.1023 0.0942 
'International Tables Vol C Tables 4.2.6.8 and 6.1.1.4' 
'Zr' 'Zr' -2.9673 0.5597 
'International Tables Vol C Tables 4.2.6.8 and 6.1.1.4' 
_symmetry_cell_setting orthorhombic 
_symmetry_space_group_name_H-M Pbca 
loop_ 
_symmetry_equiv_pos_as_xyz 
'x, y, z' 
'-x+1/2, -y, z+1/2' 
'-x, y+1/2, -z+1/2' 
'x+1/2, -y+1/2, -z' 
'-x, -y, -z' 
'x-1/2, y, -z-1/2' 
'x, -y-1/2, z-1/2' 
'-x-1/2, y-1/2, z' 
_cell_length_a 17.789(17) 
_cell_length_b 17.802(17) 
_cell_length_c 25.81(3) 
_cell_angle_alpha 90.00 
_cell_angle_beta 90.00 
_cell_angle_gamma 90.00 
_cell_volume 8175(14) 
_cell_formula_units_Z 8 
_cell_measurement_temperature 293(2) 
_cell_measurement_theta_min 2.0
_cell_measurement_theta_max 25.0
_exptl_crystal_size_max 0.32 
_exptl_crystal_size_mid 0.30
_exptl_crystal_size_min 0.18
_exptl_crystal_density_diffrn 1.082 
_exptl_crystal_density_method 'not measured' 
_exptl_crystal_F_000 2896 
_exptl_absorpt_coefficient_mu 0.370 
_exptl_absorpt_correction_type sadabs
_exptl_absorpt_correction_T_min -0.022188 
_exptl_absorpt_correction_T_max 0.257044 
_diffrn_ambient_temperature 293(2) 
_diffrn_radiation_wavelength 0.71073 
_diffrn_radiation_type MoK\a 
_diffrn_radiation_source 'fine-focus sealed tube' 
_diffrn_radiation_monochromator graphite 
_diffrn_reflns_number 23352 
_diffrn_reflns_av_R_equivalents 0.3054 
_diffrn_reflns_av_sigmaI/netI 0.1458 
_diffrn_reflns_limit_h_min -17 
_diffrn_reflns_limit_h_max 17 
_diffrn_reflns_limit_k_min -17 
_diffrn_reflns_limit_k_max 17 
_diffrn_reflns_limit_l_min -25 
_diffrn_reflns_limit_l_max 24 
_diffrn_reflns_theta_min 1.80 
_diffrn_reflns_theta_max 20.50 
_reflns_number_total 4076 
_reflns_number_gt 2081 
_reflns_threshold_expression >2sigma(I) 
_computing_structure_solution 'SHELXS-97 (Sheldrick, 1990)' 
_computing_structure_refinement 'SHELXL-97 (Sheldrick, 1997)' 
_refine_special_details 
; 
Refinement of F^2^ against ALL reflections. The weighted R-factor wR and 
goodness of fit S are based on F^2^, conventional R-factors R are based 
on F, with F set to zero for negative F^2^. The threshold expression of 
F^2^ > 2sigma(F^2^) is used only for calculating R-factors(gt) etc. and is 
not relevant to the choice of reflections for refinement. R-factors based 
on F^2^ are statistically about twice as large as those based on F, and R- 
factors based on ALL data will be even larger. 
; 
_refine_ls_structure_factor_coef Fsqd 
_refine_ls_matrix_type full 
_refine_ls_weighting_scheme calc 
_refine_ls_weighting_details 
'calc w=1/[\s^2^(Fo^2^)+(0.0903P)^2^+208.0358P] where P=(Fo^2^+2Fc^2^)/3' 
_atom_sites_solution_primary direct 
_atom_sites_solution_secondary difmap 
_atom_sites_solution_hydrogens geom 
_refine_ls_hydrogen_treatment mixed 
_refine_ls_extinction_method none 
_refine_ls_number_reflns 4076 
_refine_ls_number_parameters 352 
_refine_ls_number_restraints 0 
_refine_ls_R_factor_all 0.2031 
_refine_ls_R_factor_gt 0.1074 
_refine_ls_wR_factor_ref 0.3469 
_refine_ls_wR_factor_gt 0.2386 
_refine_ls_goodness_of_fit_ref 0.982 
_refine_ls_restrained_S_all 0.982 
_refine_ls_shift/su_max 0.025 
_refine_ls_shift/su_mean 0.002 
loop_ 
_atom_site_label 
_atom_site_type_symbol 
_atom_site_fract_x 
_atom_site_fract_y 
_atom_site_fract_z 
_atom_site_U_iso_or_equiv 
_atom_site_adp_type 
_atom_site_occupancy 
_atom_site_symmetry_multiplicity 
_atom_site_calc_flag 
_atom_site_refinement_flags 
_atom_site_disorder_assembly 
_atom_site_disorder_group 
Zr1 Zr 0.62543(11) 0.13272(9) 0.35524(6) 0.0589(8) Uani 1 1 d . . . 
P1 P 0.7731(3) 0.1495(3) 0.44793(17) 0.0706(16) Uani 1 1 d . . . 
P2 P 0.6853(3) 0.0606(3) 0.23237(16) 0.0672(16) Uani 1 1 d . . . 
N1 N 0.7080(9) 0.1458(7) 0.4088(5) 0.070(5) Uani 1 1 d . . . 
N2 N 0.6579(10) 0.0912(8) 0.2873(5) 0.079(5) Uani 1 1 d . . . 
N3 N 0.5747(9) 0.2347(9) 0.3458(6) 0.075(5) Uani 1 1 d . . . 
N4 N 0.5439(10) 0.0604(9) 0.3840(6) 0.082(5) Uani 1 1 d . . . 
C1 C 0.8430(14) 0.2222(12) 0.4271(7) 0.091(7) Uani 1 1 d . . . 
C2 C 0.9188(16) 0.2223(14) 0.4534(9) 0.129(10) Uani 1 1 d . . . 
H2A H 0.9493 0.2618 0.4392 0.194 Uiso 1 1 calc R . . 
H2B H 0.9431 0.1749 0.4478 0.194 Uiso 1 1 calc R . . 
H2C H 0.9123 0.2304 0.4899 0.194 Uiso 1 1 calc R . . 
C3 C 0.8562(18) 0.2197(18) 0.3672(8) 0.166(14) Uani 1 1 d . . . 
H3A H 0.8926 0.2570 0.3577 0.250 Uiso 1 1 calc R . . 
H3B H 0.8097 0.2297 0.3496 0.250 Uiso 1 1 calc R . . 
H3C H 0.8743 0.1709 0.3575 0.250 Uiso 1 1 calc R . . 
C4 C 0.8073(18) 0.3033(13) 0.4374(13) 0.170(14) Uani 1 1 d . . . 
H4A H 0.8426 0.3414 0.4273 0.256 Uiso 1 1 calc R . . 
H4B H 0.7958 0.3086 0.4735 0.256 Uiso 1 1 calc R . . 
H4C H 0.7621 0.3086 0.4174 0.256 Uiso 1 1 calc R . . 
C5 C 0.7351(16) 0.1772(17) 0.5155(8) 0.112(9) Uani 1 1 d . . . 
C6 C 0.678(2) 0.233(2) 0.5115(10) 0.22(2) Uani 1 1 d . . . 
H6A H 0.6600 0.2461 0.5455 0.329 Uiso 1 1 calc R . . 
H6B H 0.6368 0.2143 0.4911 0.329 Uiso 1 1 calc R . . 
H6C H 0.6981 0.2773 0.4951 0.329 Uiso 1 1 calc R . . 
C7 C 0.7948(15) 0.1928(15) 0.5564(8) 0.132(10) Uani 1 1 d . . . 
H7A H 0.7710 0.2062 0.5885 0.198 Uiso 1 1 calc R . . 
H7B H 0.8263 0.2334 0.5451 0.198 Uiso 1 1 calc R . . 
H7C H 0.8249 0.1486 0.5615 0.198 Uiso 1 1 calc R . . 
C8 C 0.693(2) 0.103(2) 0.5359(9) 0.197(17) Uani 1 1 d . . . 
H8A H 0.6728 0.1124 0.5696 0.295 Uiso 1 1 calc R . . 
H8B H 0.7288 0.0625 0.5378 0.295 Uiso 1 1 calc R . . 
H8C H 0.6537 0.0901 0.5124 0.295 Uiso 1 1 calc R . . 
C9 C 0.8225(15) 0.0561(11) 0.4519(8) 0.098(8) Uani 1 1 d . . . 
C10 C 0.8799(16) 0.0434(13) 0.4950(9) 0.128(10) Uani 1 1 d . . . 
H10A H 0.8998 -0.0066 0.4925 0.192 Uiso 1 1 calc R . . 
H10B H 0.8559 0.0497 0.5281 0.192 Uiso 1 1 calc R . . 
H10C H 0.9201 0.0791 0.4917 0.192 Uiso 1 1 calc R . . 
C11 C 0.8716(17) 0.0480(15) 0.3977(10) 0.147(12) Uani 1 1 d . . . 
H11A H 0.8978 0.0008 0.3976 0.220 Uiso 1 1 calc R . . 
H11B H 0.9074 0.0883 0.3956 0.220 Uiso 1 1 calc R . . 
H11C H 0.8383 0.0502 0.3685 0.220 Uiso 1 1 calc R . . 
C12 C 0.7672(19) -0.0073(13) 0.4453(13) 0.173(15) Uani 1 1 d . . . 
H12A H 0.7932 -0.0544 0.4475 0.259 Uiso 1 1 calc R . . 
H12B H 0.7432 -0.0032 0.4121 0.259 Uiso 1 1 calc R . . 
H12C H 0.7299 -0.0046 0.4721 0.259 Uiso 1 1 calc R . . 
C13 C 0.7274(16) -0.0362(14) 0.2387(8) 0.108(8) Uani 1 1 d . . . 
C14 C 0.7671(15) -0.0697(12) 0.1912(8) 0.115(9) Uani 1 1 d . . . 
H14A H 0.7850 -0.1192 0.1994 0.172 Uiso 1 1 calc R . . 
H14B H 0.8089 -0.0383 0.1818 0.172 Uiso 1 1 calc R . . 
H14C H 0.7324 -0.0725 0.1628 0.172 Uiso 1 1 calc R . . 
C15 C 0.7640(19) -0.0496(14) 0.2880(10) 0.164(14) Uani 1 1 d . . . 
H15A H 0.7829 -0.1002 0.2889 0.246 Uiso 1 1 calc R . . 
H15B H 0.7285 -0.0427 0.3155 0.246 Uiso 1 1 calc R . . 
H15C H 0.8050 -0.0150 0.2921 0.246 Uiso 1 1 calc R . . 
C16 C 0.648(2) -0.0918(16) 0.2444(14) 0.23(2) Uani 1 1 d . . . 
H16A H 0.6623 -0.1434 0.2483 0.338 Uiso 1 1 calc R . . 
H16B H 0.6174 -0.0865 0.2139 0.338 Uiso 1 1 calc R . . 
H16C H 0.6194 -0.0762 0.2742 0.338 Uiso 1 1 calc R . . 
C17 C 0.6007(17) 0.0582(16) 0.1858(8) 0.120(10) Uani 1 1 d . . . 
C18 C 0.597(2) 0.1465(19) 0.1674(14) 0.204(18) Uani 1 1 d . . . 
H18A H 0.5561 0.1528 0.1432 0.307 Uiso 1 1 calc R . . 
H18B H 0.6432 0.1603 0.1511 0.307 Uiso 1 1 calc R . . 
H18C H 0.5882 0.1779 0.1970 0.307 Uiso 1 1 calc R . . 
C19 C 0.6161(15) 0.0167(17) 0.1323(7) 0.149(12) Uani 1 1 d . . . 
H19A H 0.5716 0.0183 0.1114 0.223 Uiso 1 1 calc R . . 
H19B H 0.6296 -0.0347 0.1388 0.223 Uiso 1 1 calc R . . 
H19C H 0.6565 0.0414 0.1145 0.223 Uiso 1 1 calc R . . 
C20 C 0.5330(18) 0.039(3) 0.2111(11) 0.23(2) Uani 1 1 d . . . 
H20A H 0.4926 0.0385 0.1865 0.338 Uiso 1 1 calc R . . 
H20B H 0.5226 0.0747 0.2378 0.338 Uiso 1 1 calc R . . 
H20C H 0.5379 -0.0104 0.2262 0.338 Uiso 1 1 calc R . . 
C21 C 0.7601(16) 0.1255(15) 0.2074(8) 0.107(8) Uani 1 1 d . . . 
C22 C 0.7837(16) 0.1160(13) 0.1485(8) 0.132(11) Uani 1 1 d . . . 
H22A H 0.8221 0.1519 0.1401 0.198 Uiso 1 1 calc R . . 
H22B H 0.7407 0.1242 0.1268 0.198 Uiso 1 1 calc R . . 
H22C H 0.8026 0.0661 0.1430 0.198 Uiso 1 1 calc R . . 
C23 C 0.8368(18) 0.100(2) 0.2381(12) 0.173(14) Uani 1 1 d . . . 
H23A H 0.8779 0.1313 0.2273 0.260 Uiso 1 1 calc R . . 
H23B H 0.8480 0.0486 0.2303 0.260 Uiso 1 1 calc R . . 
H23C H 0.8293 0.1055 0.2748 0.260 Uiso 1 1 calc R . . 
C24 C 0.745(3) 0.2030(12) 0.2170(13) 0.25(3) Uani 1 1 d . . . 
H24A H 0.7855 0.2328 0.2031 0.379 Uiso 1 1 calc R . . 
H24B H 0.7416 0.2114 0.2536 0.379 Uiso 1 1 calc R . . 
H24C H 0.6989 0.2169 0.2006 0.379 Uiso 1 1 calc R . . 
C25 C 0.5245(16) 0.3278(16) 0.4096(11) 0.144(11) Uani 1 1 d . . . 
H25A H 0.5359 0.3732 0.4281 0.217 Uiso 1 1 calc R . . 
H25B H 0.5165 0.2877 0.4339 0.217 Uiso 1 1 calc R . . 
H25C H 0.4799 0.3351 0.3894 0.217 Uiso 1 1 calc R . . 
C26 C 0.5899(16) 0.3080(14) 0.3740(10) 0.121(9) Uani 1 1 d . . . 
H26A H 0.6356 0.3033 0.3943 0.145 Uiso 1 1 calc R . . 
H26B H 0.5972 0.3480 0.3490 0.145 Uiso 1 1 calc R . . 
C27 C 0.530(2) 0.2987(18) 0.2642(11) 0.196(18) Uani 1 1 d . . . 
H27A H 0.4873 0.2990 0.2412 0.295 Uiso 1 1 calc R . . 
H27B H 0.5740 0.2841 0.2454 0.295 Uiso 1 1 calc R . . 
H27C H 0.5368 0.3480 0.2783 0.295 Uiso 1 1 calc R . . 
C28 C 0.5160(18) 0.2442(13) 0.3071(10) 0.137(11) Uani 1 1 d . . . 
H28A H 0.4705 0.2595 0.3249 0.165 Uiso 1 1 calc R . . 
H28B H 0.5062 0.1954 0.2917 0.165 Uiso 1 1 calc R . . 
C29 C 0.448(2) 0.0992(19) 0.4495(10) 0.188(18) Uani 1 1 d . . . 
H29A H 0.4448 0.1020 0.4866 0.282 Uiso 1 1 calc R . . 
H29B H 0.4094 0.0658 0.4369 0.282 Uiso 1 1 calc R . . 
H29C H 0.4402 0.1483 0.4351 0.282 Uiso 1 1 calc R . . 
C30 C 0.512(3) 0.0745(15) 0.4362(14) 0.21(2) Uani 1 1 d . . . 
H30A H 0.5173 0.0270 0.4543 0.251 Uiso 1 1 calc R . . 
H30B H 0.5478 0.1083 0.4526 0.251 Uiso 1 1 calc R . . 
C31 C 0.529(4) -0.007(2) 0.3724(17) 0.36(5) Uani 1 1 d . . . 
C32 C 0.5072(19) -0.0687(19) 0.3703(12) 0.174(14) Uani 1 1 d . . . 
H32A H 0.5233 -0.0913 0.3384 0.261 Uiso 1 1 calc R . . 
H32B H 0.4532 -0.0685 0.3717 0.261 Uiso 1 1 calc R . . 
H32C H 0.5267 -0.0968 0.3990 0.261 Uiso 1 1 calc R . . 
loop_ 
_atom_site_aniso_label 
_atom_site_aniso_U_11 
_atom_site_aniso_U_22 
_atom_site_aniso_U_33 
_atom_site_aniso_U_23 
_atom_site_aniso_U_13 
_atom_site_aniso_U_12 
Zr1 0.0968(17) 0.0576(11) 0.0223(9) -0.0055(8) 0.0002(9) 0.0039(10) 
P1 0.115(5) 0.073(3) 0.023(2) -0.004(2) -0.012(3) -0.006(3) 
P2 0.108(5) 0.070(3) 0.024(2) -0.009(2) 0.002(3) 0.001(3) 
N1 0.114(14) 0.064(9) 0.033(8) -0.009(7) -0.002(9) 0.002(9) 
N2 0.133(15) 0.081(10) 0.025(8) -0.026(7) 0.038(9) -0.021(10) 
N3 0.091(13) 0.092(12) 0.041(9) -0.017(8) -0.002(9) 0.009(10) 
N4 0.128(15) 0.078(11) 0.040(9) -0.015(8) 0.006(10) -0.004(10) 
C1 0.13(2) 0.091(16) 0.053(13) -0.003(11) -0.030(14) -0.006(14) 
C2 0.18(3) 0.14(2) 0.069(16) 0.024(15) -0.016(19) -0.03(2) 
C3 0.23(3) 0.22(3) 0.049(15) 0.033(17) -0.014(19) -0.11(3) 
C4 0.23(4) 0.085(19) 0.20(3) 0.010(19) -0.04(3) -0.02(2) 
C5 0.13(2) 0.18(2) 0.031(13) -0.040(15) 0.008(15) -0.01(2) 
C6 0.25(4) 0.34(5) 0.068(19) -0.10(3) 0.00(2) 0.17(4) 
C7 0.18(3) 0.18(2) 0.037(13) -0.036(15) 0.000(16) 0.02(2) 
C8 0.24(4) 0.30(4) 0.054(17) 0.03(2) 0.05(2) -0.09(4) 
C9 0.14(2) 0.075(14) 0.077(16) -0.001(11) -0.044(16) 0.006(14) 
C10 0.18(3) 0.120(19) 0.085(17) 0.009(14) -0.045(19) 0.033(18) 
C11 0.21(3) 0.14(2) 0.092(19) -0.027(17) 0.01(2) 0.06(2) 
C12 0.24(4) 0.071(16) 0.21(3) 0.013(18) -0.09(3) -0.02(2) 
C13 0.15(2) 0.121(18) 0.055(14) -0.014(13) -0.015(16) 0.036(18) 
C14 0.18(3) 0.094(15) 0.066(15) -0.023(12) 0.039(16) 0.034(16) 
C15 0.28(4) 0.12(2) 0.090(19) -0.026(16) -0.05(2) 0.09(2) 
C16 0.35(6) 0.13(2) 0.19(4) -0.05(2) 0.18(4) -0.08(3) 
C17 0.16(3) 0.16(2) 0.037(13) -0.039(14) 0.005(15) 0.02(2) 
C18 0.27(5) 0.20(4) 0.14(3) 0.02(3) -0.07(3) 0.07(3) 
C19 0.17(3) 0.24(3) 0.035(13) -0.069(17) -0.015(15) 0.03(2) 
C20 0.14(3) 0.46(7) 0.08(2) -0.05(3) 0.03(2) -0.07(4) 
C21 0.13(2) 0.15(2) 0.041(12) -0.009(13) 0.016(14) -0.033(18) 
C22 0.20(3) 0.12(2) 0.079(17) 0.029(15) 0.067(18) -0.005(19) 
C23 0.15(3) 0.26(4) 0.11(2) -0.02(3) 0.03(2) -0.05(3) 
C24 0.49(7) 0.038(14) 0.23(4) -0.029(18) 0.22(4) -0.05(2) 
C25 0.16(3) 0.15(2) 0.12(2) -0.005(19) 0.05(2) 0.03(2) 
C26 0.16(3) 0.112(19) 0.089(18) -0.003(15) 0.019(19) 0.002(18) 
C27 0.31(5) 0.19(3) 0.09(2) 0.02(2) -0.03(3) 0.12(3) 
C28 0.23(3) 0.097(18) 0.087(19) -0.038(15) -0.02(2) 0.04(2) 
C29 0.25(4) 0.24(4) 0.073(18) -0.03(2) 0.06(2) 0.12(3) 
C30 0.34(6) 0.08(2) 0.20(4) -0.05(2) 0.13(4) -0.06(3) 
C31 0.73(12) 0.11(3) 0.23(5) -0.08(3) 0.31(6) -0.18(5) 
C32 0.22(4) 0.15(3) 0.14(3) -0.01(2) 0.08(3) -0.06(3) 
_geom_special_details 
; 
All esds (except the esd in the dihedral angle between two l.s. planes) 
are estimated using the full covariance matrix. The cell esds are taken 
into account individually in the estimation of esds in distances, angles 
and torsion angles; correlations between esds in cell parameters are only 
used when they are defined by crystal symmetry. An approximate (isotropic) 
treatment of cell esds is used for estimating esds involving l.s. planes. 
; 
loop_ 
_geom_bond_atom_site_label_1 
_geom_bond_atom_site_label_2 
_geom_bond_distance 
_geom_bond_site_symmetry_2 
_geom_bond_publ_flag 
Zr1 N2 1.988(12) . ? 
Zr1 N1 2.029(15) . ? 
Zr1 N3 2.042(16) . ? 
Zr1 N4 2.076(17) . ? 
P1 N1 1.540(16) . ? 
P1 C1 1.87(2) . ? 
P1 C9 1.88(2) . ? 
P1 C5 1.94(2) . ? 
P2 N2 1.596(13) . ? 
P2 C13 1.89(2) . ? 
P2 C21 1.88(2) . ? 
P2 C17 1.93(3) . ? 
N3 C28 1.45(3) . ? 
N3 C26 1.52(3) . ? 
N4 C31 1.27(3) . ? 
N4 C30 1.48(3) . ? 
C1 C2 1.51(3) . ? 
C1 C3 1.57(3) . ? 
C1 C4 1.60(3) . ? 
C5 C6 1.43(4) . ? 
C5 C7 1.52(3) . ? 
C5 C8 1.60(4) . ? 
C9 C12 1.51(3) . ? 
C9 C10 1.53(3) . ? 
C9 C11 1.65(3) . ? 
C13 C15 1.45(3) . ? 
C13 C14 1.54(3) . ? 
C13 C16 1.73(4) . ? 
C17 C20 1.41(4) . ? 
C17 C19 1.59(3) . ? 
C17 C18 1.64(4) . ? 
C21 C24 1.43(3) . ? 
C21 C22 1.59(3) . ? 
C21 C23 1.64(4) . ? 
C25 C26 1.52(3) . ? 
C27 C28 1.49(4) . ? 
C29 C30 1.28(4) . ? 
C31 C32 1.17(4) . ? 
loop_ 
_geom_angle_atom_site_label_1 
_geom_angle_atom_site_label_2 
_geom_angle_atom_site_label_3 
_geom_angle 
_geom_angle_site_symmetry_1 
_geom_angle_site_symmetry_3 
_geom_angle_publ_flag 
N2 Zr1 N1 115.6(7) . . ? 
N2 Zr1 N3 110.7(6) . . ? 
N1 Zr1 N3 107.4(6) . . ? 
N2 Zr1 N4 106.7(6) . . ? 
N1 Zr1 N4 109.4(6) . . ? 
N3 Zr1 N4 106.6(7) . . ? 
N1 P1 C1 110.0(9) . . ? 
N1 P1 C9 110.4(9) . . ? 
C1 P1 C9 108.4(11) . . ? 
N1 P1 C5 109.9(10) . . ? 
C1 P1 C5 108.3(11) . . ? 
C9 P1 C5 109.8(12) . . ? 
N2 P2 C13 110.9(9) . . ? 
N2 P2 C21 108.2(9) . . ? 
C13 P2 C21 108.0(13) . . ? 
N2 P2 C17 108.9(10) . . ? 
C13 P2 C17 110.1(12) . . ? 
C21 P2 C17 110.7(12) . . ? 
P1 N1 Zr1 175.4(9) . . ? 
P2 N2 Zr1 178.0(10) . . ? 
C28 N3 C26 111.0(17) . . ? 
C28 N3 Zr1 120.1(13) . . ? 
C26 N3 Zr1 128.9(14) . . ? 
C31 N4 C30 107(2) . . ? 
C31 N4 Zr1 130(2) . . ? 
C30 N4 Zr1 119.0(15) . . ? 
C2 C1 C3 108(2) . . ? 
C2 C1 C4 106.2(19) . . ? 
C3 C1 C4 104(2) . . ? 
C2 C1 P1 117.7(15) . . ? 
C3 C1 P1 111.3(15) . . ? 
C4 C1 P1 108.2(18) . . ? 
C6 C5 C7 115(2) . . ? 
C6 C5 C8 106(3) . . ? 
C7 C5 C8 104(2) . . ? 
C6 C5 P1 111.1(19) . . ? 
C7 C5 P1 115.3(18) . . ? 
C8 C5 P1 104.4(17) . . ? 
C12 C9 C10 114(2) . . ? 
C12 C9 C11 101(2) . . ? 
C10 C9 C11 105(2) . . ? 
C12 C9 P1 110.5(18) . . ? 
C10 C9 P1 118.8(15) . . ? 
C11 C9 P1 106.1(15) . . ? 
C15 C13 C14 115(2) . . ? 
C15 C13 C16 101(2) . . ? 
C14 C13 C16 102.9(19) . . ? 
C15 C13 P2 113.9(16) . . ? 
C14 C13 P2 118.0(16) . . ? 
C16 C13 P2 101.8(18) . . ? 
C20 C17 C19 116(3) . . ? 
C20 C17 C18 109(3) . . ? 
C19 C17 C18 102(2) . . ? 
C20 C17 P2 112.5(19) . . ? 
C19 C17 P2 114.7(19) . . ? 
C18 C17 P2 101.1(19) . . ? 
C24 C21 C22 109(2) . . ? 
C24 C21 C23 110(3) . . ? 
C22 C21 C23 102(2) . . ? 
C24 C21 P2 114(2) . . ? 
C22 C21 P2 116.8(17) . . ? 
C23 C21 P2 104.7(17) . . ? 
C25 C26 N3 111(2) . . ? 
N3 C28 C27 118(3) . . ? 
C29 C30 N4 130(4) . . ? 
C32 C31 N4 167(4) . . ? 
_diffrn_measured_fraction_theta_max 0.993 
_diffrn_reflns_theta_full 20.50 
_diffrn_measured_fraction_theta_full 0.993 
_refine_diff_density_max 0.870 
_refine_diff_density_min -1.418 
_refine_diff_density_rms 0.113 
#===end

data_ Zr(NPt-Bu3)3(NMe2)
_audit_creation_method SHELXL-97 
_chemical_formula_sum 
'C38 H60 N4 P3 Zr' 
_chemical_formula_weight 757.03 
loop_ 
_atom_type_symbol 
_atom_type_description 
_atom_type_scat_dispersion_real 
_atom_type_scat_dispersion_imag 
_atom_type_scat_source 
'C' 'C' 0.0033 0.0016 
'International Tables Vol C Tables 4.2.6.8 and 6.1.1.4' 
'H' 'H' 0.0000 0.0000 
'International Tables Vol C Tables 4.2.6.8 and 6.1.1.4' 
'N' 'N' 0.0061 0.0033 
'International Tables Vol C Tables 4.2.6.8 and 6.1.1.4' 
'P' 'P' 0.1023 0.0942 
'International Tables Vol C Tables 4.2.6.8 and 6.1.1.4' 
'Zr' 'Zr' -2.9673 0.5597 
'International Tables Vol C Tables 4.2.6.8 and 6.1.1.4' 
_symmetry_cell_setting triclinic 
_symmetry_space_group_name_H-M P-1 
loop_ 
_symmetry_equiv_pos_as_xyz 
'x, y, z' 
'-x, -y, -z' 
_cell_length_a 13.306(9) 
_cell_length_b 13.409(9) 
_cell_length_c 16.000(11) 
_cell_angle_alpha 79.100(13) 
_cell_angle_beta 73.208(12) 
_cell_angle_gamma 60.701(13) 
_cell_volume 2379(3) 
_cell_formula_units_Z 2 
_cell_measurement_temperature 293(2) 
_cell_measurement_theta_min 2.0
_cell_measurement_theta_max 25.0
_exptl_crystal_size_max 0.33 
_exptl_crystal_size_mid 0.32
_exptl_crystal_size_min 0.18 
_exptl_crystal_density_diffrn 1.057 
_exptl_crystal_density_method 'not measured' 
_exptl_crystal_F_000 802 
_exptl_absorpt_coefficient_mu 0.357 
_exptl_absorpt_correction_type sadabs
_exptl_absorpt_correction_T_min 0.594676 
_exptl_absorpt_correction_T_max 1.000000 
_diffrn_ambient_temperature 293(2) 
_diffrn_radiation_wavelength 0.71073 
_diffrn_radiation_type MoK\a 
_diffrn_radiation_source 'fine-focus sealed tube' 
_diffrn_radiation_monochromator graphite 
_diffrn_reflns_number 9774 
_diffrn_reflns_av_R_equivalents 0.0249 
_diffrn_reflns_av_sigmaI/netI 0.0312 
_diffrn_reflns_limit_h_min -9 
_diffrn_reflns_limit_h_max 14 
_diffrn_reflns_limit_k_min -12 
_diffrn_reflns_limit_k_max 14 
_diffrn_reflns_limit_l_min -17 
_diffrn_reflns_limit_l_max 17 
_diffrn_reflns_theta_min 1.74 
_diffrn_reflns_theta_max 23.32 
_reflns_number_total 6723 
_reflns_number_gt 5405 
_reflns_threshold_expression >2sigma(I) 
_computing_structure_solution 'SHELXS-97 (Sheldrick, 1990)' 
_computing_structure_refinement 'SHELXL-97 (Sheldrick, 1997)' 
_refine_special_details 
; 
Refinement of F^2^ against ALL reflections. The weighted R-factor wR and 
goodness of fit S are based on F^2^, conventional R-factors R are based 
on F, with F set to zero for negative F^2^. The threshold expression of 
F^2^ > 2sigma(F^2^) is used only for calculating R-factors(gt) etc. and is 
not relevant to the choice of reflections for refinement. R-factors based 
on F^2^ are statistically about twice as large as those based on F, and R- 
factors based on ALL data will be even larger. 
; 
_refine_ls_structure_factor_coef Fsqd 
_refine_ls_matrix_type full 
_refine_ls_weighting_scheme calc 
_refine_ls_weighting_details 
'calc w=1/[\s^2^(Fo^2^)+(0.1082P)^2^+5.7921P] where P=(Fo^2^+2Fc^2^)/3' 
_atom_sites_solution_primary direct 
_atom_sites_solution_secondary difmap 
_atom_sites_solution_hydrogens geom 
_refine_ls_hydrogen_treatment mixed 
_refine_ls_extinction_method none 
_refine_ls_number_reflns 6723 
_refine_ls_number_parameters 379 
_refine_ls_number_restraints 6 
_refine_ls_R_factor_all 0.0947 
_refine_ls_R_factor_gt 0.0722 
_refine_ls_wR_factor_ref 0.2166 
_refine_ls_wR_factor_gt 0.1864 
_refine_ls_goodness_of_fit_ref 1.187 
_refine_ls_restrained_S_all 1.192 
_refine_ls_shift/su_max 0.066 
_refine_ls_shift/su_mean 0.005 
loop_ 
_atom_site_label 
_atom_site_type_symbol 
_atom_site_fract_x 
_atom_site_fract_y 
_atom_site_fract_z 
_atom_site_U_iso_or_equiv 
_atom_site_adp_type 
_atom_site_occupancy 
_atom_site_symmetry_multiplicity 
_atom_site_calc_flag 
_atom_site_refinement_flags 
_atom_site_disorder_assembly 
_atom_site_disorder_group 
Zr1 Zr 0.80973(5) 0.32907(4) 0.20013(3) 0.0355(2) Uani 1 1 d . . . 
P1 P 0.75453(16) 0.08877(13) 0.24293(11) 0.0455(4) Uani 1 1 d . . . 
P2 P 0.55234(14) 0.60014(12) 0.21607(11) 0.0429(4) Uani 1 1 d . . . 
P3 P 1.01541(15) 0.30657(15) 0.31353(12) 0.0502(5) Uani 1 1 d D . . 
N1 N 0.7677(5) 0.2000(4) 0.2292(4) 0.0563(15) Uani 1 1 d . . . 
N2 N 0.6617(5) 0.4809(4) 0.2190(4) 0.0531(14) Uani 1 1 d . . . 
N3 N 0.9295(5) 0.3117(5) 0.2632(4) 0.0537(14) Uani 1 1 d . . . 
N4 N 0.8902(5) 0.3238(5) 0.0683(4) 0.0588(15) Uani 1 1 d . . . 
C1 C 0.9047(8) -0.0430(7) 0.2306(6) 0.081(3) Uani 1 1 d . . . 
C2 C 0.9580(13) -0.0460(14) 0.3052(11) 0.173(7) Uani 1 1 d . . . 
H2A H 1.0344 -0.1118 0.3012 0.259 Uiso 1 1 calc R . . 
H2B H 0.9068 -0.0506 0.3605 0.259 Uiso 1 1 calc R . . 
H2C H 0.9660 0.0223 0.3006 0.259 Uiso 1 1 calc R . . 
C3 C 0.9114(14) -0.1582(8) 0.2307(11) 0.171(7) Uani 1 1 d . . . 
H3A H 0.9923 -0.2163 0.2240 0.257 Uiso 1 1 calc R . . 
H3B H 0.8813 -0.1588 0.1831 0.257 Uiso 1 1 calc R . . 
H3C H 0.8649 -0.1730 0.2850 0.257 Uiso 1 1 calc R . . 
C4 C 0.9844(11) -0.0264(11) 0.1452(9) 0.151(6) Uani 1 1 d . . . 
H4A H 1.0610 -0.0923 0.1375 0.227 Uiso 1 1 calc R . . 
H4B H 0.9925 0.0405 0.1470 0.227 Uiso 1 1 calc R . . 
H4C H 0.9501 -0.0168 0.0973 0.227 Uiso 1 1 calc R . . 
C5 C 0.6830(12) 0.0832(9) 0.1576(7) 0.106(4) Uani 1 1 d . . . 
C6 C 0.757(2) 0.084(3) 0.0702(8) 0.273(15) Uani 1 1 d . . . 
H6A H 0.7206 0.0803 0.0277 0.410 Uiso 1 1 calc R . . 
H6B H 0.8336 0.0195 0.0664 0.410 Uiso 1 1 calc R . . 
H6C H 0.7638 0.1536 0.0591 0.410 Uiso 1 1 calc R . . 
C7 C 0.5661(18) 0.1988(17) 0.1589(15) 0.229(11) Uani 1 1 d . . . 
H7A H 0.5279 0.1996 0.1161 0.344 Uiso 1 1 calc R . . 
H7B H 0.5847 0.2617 0.1456 0.344 Uiso 1 1 calc R . . 
H7C H 0.5141 0.2061 0.2158 0.344 Uiso 1 1 calc R . . 
C8 C 0.655(2) -0.0149(15) 0.1692(15) 0.262(14) Uani 1 1 d . . . 
H8A H 0.6212 -0.0107 0.1225 0.393 Uiso 1 1 calc R . . 
H8B H 0.6001 -0.0111 0.2241 0.393 Uiso 1 1 calc R . . 
H8C H 0.7267 -0.0859 0.1683 0.393 Uiso 1 1 calc R . . 
C9 C 0.6625(9) 0.0807(8) 0.3566(6) 0.084(3) Uani 1 1 d . . . 
C10 C 0.6526(17) -0.0299(12) 0.3855(9) 0.194(9) Uani 1 1 d . . . 
H10A H 0.6045 -0.0243 0.4438 0.291 Uiso 1 1 calc R . . 
H10B H 0.7301 -0.0932 0.3842 0.291 Uiso 1 1 calc R . . 
H10C H 0.6169 -0.0419 0.3465 0.291 Uiso 1 1 calc R . . 
C11 C 0.7124(17) 0.105(2) 0.4199(7) 0.210(10) Uani 1 1 d . . . 
H11A H 0.6682 0.1012 0.4785 0.315 Uiso 1 1 calc R . . 
H11B H 0.7067 0.1803 0.4060 0.315 Uiso 1 1 calc R . . 
H11C H 0.7939 0.0494 0.4153 0.315 Uiso 1 1 calc R . . 
C12 C 0.5369(12) 0.1801(14) 0.3644(11) 0.184(8) Uani 1 1 d . . . 
H12A H 0.4900 0.1765 0.4220 0.276 Uiso 1 1 calc R . . 
H12B H 0.5019 0.1746 0.3218 0.276 Uiso 1 1 calc R . . 
H12C H 0.5402 0.2515 0.3542 0.276 Uiso 1 1 calc R . . 
C13 C 0.5854(8) 0.6933(7) 0.1202(6) 0.078(3) Uani 1 1 d . . . 
C14 C 0.5984(13) 0.6470(12) 0.0343(7) 0.143(5) Uani 1 1 d . . . 
H14A H 0.6156 0.6947 -0.0144 0.215 Uiso 1 1 calc R . . 
H14B H 0.5258 0.6475 0.0348 0.215 Uiso 1 1 calc R . . 
H14C H 0.6617 0.5701 0.0292 0.215 Uiso 1 1 calc R . . 
C15 C 0.7056(11) 0.6825(11) 0.1123(9) 0.135(5) Uani 1 1 d . . . 
H15A H 0.7225 0.7297 0.0630 0.202 Uiso 1 1 calc R . . 
H15B H 0.7643 0.6041 0.1043 0.202 Uiso 1 1 calc R . . 
H15C H 0.7067 0.7068 0.1646 0.202 Uiso 1 1 calc R . . 
C16 C 0.4937(11) 0.8216(8) 0.1194(8) 0.133(5) Uani 1 1 d . . . 
H16A H 0.5189 0.8609 0.0677 0.199 Uiso 1 1 calc R . . 
H16B H 0.4874 0.8545 0.1702 0.199 Uiso 1 1 calc R . . 
H16C H 0.4181 0.8290 0.1199 0.199 Uiso 1 1 calc R . . 
C17 C 0.5084(9) 0.6734(7) 0.3202(5) 0.084(3) Uani 1 1 d . . . 
C18 C 0.3793(12) 0.7759(10) 0.3374(7) 0.149(6) Uani 1 1 d . . . 
H18A H 0.3633 0.8096 0.3906 0.224 Uiso 1 1 calc R . . 
H18B H 0.3235 0.7481 0.3425 0.224 Uiso 1 1 calc R . . 
H18C H 0.3724 0.8324 0.2896 0.224 Uiso 1 1 calc R . . 
C19 C 0.5951(15) 0.7159(14) 0.3191(9) 0.147(6) Uani 1 1 d . . . 
H19A H 0.5721 0.7528 0.3722 0.221 Uiso 1 1 calc R . . 
H19B H 0.5951 0.7696 0.2700 0.221 Uiso 1 1 calc R . . 
H19C H 0.6730 0.6523 0.3144 0.221 Uiso 1 1 calc R . . 
C20 C 0.5161(12) 0.5877(10) 0.3965(6) 0.125(5) Uani 1 1 d . . . 
H20A H 0.4949 0.6243 0.4494 0.188 Uiso 1 1 calc R . . 
H20B H 0.5956 0.5265 0.3892 0.188 Uiso 1 1 calc R . . 
H20C H 0.4628 0.5575 0.3996 0.188 Uiso 1 1 calc R . . 
C21 C 0.4229(8) 0.5839(8) 0.2038(8) 0.094(3) Uani 1 1 d . . . 
C22 C 0.3171(11) 0.6936(13) 0.1795(12) 0.176(7) Uani 1 1 d . . . 
H22A H 0.2580 0.6749 0.1747 0.264 Uiso 1 1 calc R . . 
H22B H 0.3434 0.7270 0.1246 0.264 Uiso 1 1 calc R . . 
H22C H 0.2839 0.7472 0.2240 0.264 Uiso 1 1 calc R . . 
C23 C 0.3847(12) 0.5243(13) 0.2892(11) 0.162(7) Uani 1 1 d . . . 
H23A H 0.3191 0.5144 0.2860 0.243 Uiso 1 1 calc R . . 
H23B H 0.3613 0.5703 0.3373 0.243 Uiso 1 1 calc R . . 
H23C H 0.4496 0.4507 0.2979 0.243 Uiso 1 1 calc R . . 
C24 C 0.4706(14) 0.4981(15) 0.1336(12) 0.175(7) Uani 1 1 d . . . 
H24A H 0.4069 0.4887 0.1258 0.263 Uiso 1 1 calc R . . 
H24B H 0.5296 0.4256 0.1516 0.263 Uiso 1 1 calc R . . 
H24C H 0.5053 0.5262 0.0794 0.263 Uiso 1 1 calc R . . 
C25A C 1.0657(17) 0.4192(15) 0.2688(12) 0.068(5) Uiso 0.50 1 d PD . . 
C25B C 1.023(2) 0.4450(15) 0.2998(15) 0.085(6) Uiso 0.50 1 d PD . . 
C26 C 0.9877(17) 0.5137(17) 0.2205(13) 0.178(7) Uiso 1 1 d . . . 
C27 C 1.1297(13) 0.4437(13) 0.3248(10) 0.139(5) Uiso 1 1 d . . . 
C28B C 1.156(2) 0.381(2) 0.1832(18) 0.130(9) Uiso 0.50 1 d P . . 
C28A C 0.914(2) 0.534(2) 0.3526(17) 0.122(8) Uiso 0.50 1 d P . . 
C29A C 1.1713(14) 0.1843(16) 0.2641(15) 0.090(6) Uiso 0.50 1 d PD . . 
C29B C 1.1486(16) 0.1622(14) 0.3152(15) 0.089(6) Uiso 0.50 1 d PD . . 
C30 C 1.1710(17) 0.0975(18) 0.2372(13) 0.177(7) Uiso 1 1 d . . . 
C31 C 1.2601(14) 0.1441(13) 0.3368(10) 0.141(5) Uiso 1 1 d . . . 
C32B C 1.108(2) 0.077(2) 0.3858(15) 0.107(7) Uiso 0.50 1 d P . . 
C32A C 1.223(3) 0.224(2) 0.1759(18) 0.129(9) Uiso 0.50 1 d P . . 
C33A C 0.9306(16) 0.3424(18) 0.4352(9) 0.079(5) Uiso 0.50 1 d PD . . 
C33B C 0.9711(16) 0.2704(17) 0.4325(9) 0.074(4) Uiso 0.50 1 d PD . . 
C34 C 0.8404(16) 0.3129(15) 0.4642(11) 0.161(6) Uiso 1 1 d . . . 
C35 C 1.0176(12) 0.3027(12) 0.4984(9) 0.122(4) Uiso 1 1 d . . . 
C36B C 0.836(2) 0.469(2) 0.4443(17) 0.121(8) Uiso 0.50 1 d P . . 
C36A C 0.990(2) 0.144(2) 0.4483(16) 0.111(7) Uiso 0.50 1 d P . . 
C37 C 1.0001(14) 0.320(2) 0.0224(8) 0.190(9) Uani 1 1 d . . . 
H37A H 1.0101 0.3161 -0.0390 0.285 Uiso 1 1 calc R . . 
H37B H 1.0631 0.2533 0.0429 0.285 Uiso 1 1 calc R . . 
H37C H 1.0019 0.3874 0.0321 0.285 Uiso 1 1 calc R . . 
C38 C 0.8333(11) 0.3301(11) 0.0011(7) 0.110(4) Uani 1 1 d . . . 
H38A H 0.8857 0.3262 -0.0553 0.165 Uiso 1 1 calc R . . 
H38B H 0.7615 0.4011 0.0036 0.165 Uiso 1 1 calc R . . 
H38C H 0.8152 0.2673 0.0107 0.165 Uiso 1 1 calc R . . 
loop_ 
_atom_site_aniso_label 
_atom_site_aniso_U_11 
_atom_site_aniso_U_22 
_atom_site_aniso_U_33 
_atom_site_aniso_U_23 
_atom_site_aniso_U_13 
_atom_site_aniso_U_12 
Zr1 0.0370(4) 0.0241(3) 0.0382(3) -0.0038(2) -0.0055(2) -0.0097(2) 
P1 0.0601(11) 0.0320(8) 0.0464(9) -0.0012(7) -0.0116(8) -0.0236(8) 
P2 0.0393(9) 0.0268(8) 0.0498(9) -0.0034(6) -0.0070(7) -0.0069(7) 
P3 0.0467(10) 0.0516(10) 0.0585(10) 0.0093(8) -0.0192(8) -0.0278(8) 
N1 0.065(4) 0.034(3) 0.068(4) -0.008(3) -0.012(3) -0.023(3) 
N2 0.056(3) 0.030(3) 0.057(3) -0.003(2) -0.008(3) -0.010(2) 
N3 0.046(3) 0.055(3) 0.057(3) -0.003(3) -0.012(3) -0.022(3) 
N4 0.061(4) 0.057(3) 0.049(3) -0.012(3) 0.002(3) -0.025(3) 
C1 0.083(6) 0.043(4) 0.100(7) -0.009(4) -0.012(5) -0.019(4) 
C2 0.117(11) 0.166(15) 0.200(17) -0.019(12) -0.090(11) -0.006(10) 
C3 0.187(14) 0.028(5) 0.215(16) -0.007(7) 0.006(12) -0.014(7) 
C4 0.105(9) 0.099(9) 0.168(12) -0.022(8) 0.060(9) -0.029(7) 
C5 0.170(11) 0.093(7) 0.111(8) 0.029(6) -0.091(8) -0.083(8) 
C6 0.33(3) 0.53(4) 0.050(7) -0.014(14) -0.058(12) -0.26(3) 
C7 0.24(2) 0.191(18) 0.31(3) 0.052(18) -0.23(2) -0.074(17) 
C8 0.48(4) 0.175(16) 0.35(3) 0.089(17) -0.31(3) -0.23(2) 
C9 0.101(7) 0.082(6) 0.060(5) -0.011(4) 0.018(5) -0.053(6) 
C10 0.29(2) 0.128(11) 0.137(11) -0.011(9) 0.081(13) -0.148(14) 
C11 0.26(2) 0.37(3) 0.055(7) -0.059(11) 0.028(9) -0.21(2) 
C12 0.112(11) 0.156(14) 0.173(15) -0.008(11) 0.050(10) -0.023(10) 
C13 0.079(6) 0.051(4) 0.069(5) 0.012(4) -0.008(4) -0.014(4) 
C14 0.177(13) 0.142(11) 0.059(6) 0.004(6) -0.013(7) -0.045(10) 
C15 0.108(9) 0.125(10) 0.142(11) 0.055(8) -0.008(8) -0.066(8) 
C16 0.142(10) 0.061(6) 0.123(9) 0.048(6) -0.016(8) -0.019(6) 
C17 0.106(7) 0.053(5) 0.053(4) -0.014(4) -0.015(4) -0.003(5) 
C18 0.157(12) 0.087(8) 0.096(8) -0.047(6) -0.030(8) 0.039(7) 
C19 0.202(16) 0.173(14) 0.131(11) -0.031(10) -0.054(10) -0.119(13) 
C20 0.161(11) 0.110(9) 0.058(6) 0.000(5) -0.018(6) -0.032(8) 
C21 0.056(5) 0.078(6) 0.152(10) -0.025(6) -0.026(6) -0.025(5) 
C22 0.084(9) 0.148(13) 0.28(2) -0.025(13) -0.094(11) -0.010(8) 
C23 0.111(10) 0.146(12) 0.245(18) -0.026(12) 0.015(11) -0.096(10) 
C24 0.160(14) 0.190(16) 0.235(19) -0.092(14) -0.061(13) -0.090(13) 
C37 0.148(13) 0.38(3) 0.077(8) -0.047(12) 0.012(8) -0.152(17) 
C38 0.121(9) 0.121(9) 0.078(6) -0.022(6) -0.012(6) -0.049(8) 
_geom_special_details 
; 
All esds (except the esd in the dihedral angle between two l.s. planes) 
are estimated using the full covariance matrix. The cell esds are taken 
into account individually in the estimation of esds in distances, angles 
and torsion angles; correlations between esds in cell parameters are only 
used when they are defined by crystal symmetry. An approximate (isotropic) 
treatment of cell esds is used for estimating esds involving l.s. planes. 
; 
loop_ 
_geom_bond_atom_site_label_1 
_geom_bond_atom_site_label_2 
_geom_bond_distance 
_geom_bond_site_symmetry_2 
_geom_bond_publ_flag 
Zr1 N1 2.005(6) . ? 
Zr1 N2 2.020(5) . ? 
Zr1 N3 2.022(6) . ? 
Zr1 N4 2.068(6) . ? 
P1 N1 1.553(6) . ? 
P1 C9 1.893(8) . ? 
P1 C1 1.898(9) . ? 
P1 C5 1.907(9) . ? 
P2 N2 1.552(5) . ? 
P2 C13 1.879(8) . ? 
P2 C17 1.891(8) . ? 
P2 C21 1.905(9) . ? 
P3 N3 1.547(6) . ? 
P3 C33B 1.868(13) . ? 
P3 C25B 1.874(15) . ? 
P3 C29B 1.881(15) . ? 

P3 C25A 1.882(13) . ? 
P3 C29A 1.957(15) . ? 
P3 C33A 1.961(14) . ? 
N4 C37 1.414(14) . ? 
N4 C38 1.452(12) . ? 
C1 C3 1.503(14) . ? 
C1 C4 1.523(14) . ? 
C1 C2 1.540(17) . ? 
C5 C6 1.458(19) . ? 
C5 C8 1.499(16) . ? 
C5 C7 1.57(2) . ? 
C9 C11 1.518(18) . ? 
C9 C10 1.526(14) . ? 
C9 C12 1.532(16) . ? 
C13 C15 1.503(15) . ? 
C13 C14 1.544(15) . ? 
C13 C16 1.547(12) . ? 
C17 C20 1.498(13) . ? 
C17 C19 1.511(16) . ? 
C17 C18 1.573(13) . ? 
C21 C23 1.533(18) . ? 
C21 C24 1.534(17) . ? 
C21 C22 1.539(15) . ? 
C25A C25B 0.63(2) . ? 
C25A C26 1.45(2) . ? 
C25A C28B 1.52(3) . ? 
C25A C27 1.57(2) . ? 
C25B C26 1.47(3) . ? 
C25B C28A 1.49(3) . ? 
C25B C27 1.58(2) . ? 
C28B C32A 1.86(4) . ? 
C28A C36B 1.87(4) . ? 
C29A C29B 0.84(2) . ? 
C29A C30 1.32(3) . ? 
C29A C32A 1.50(3) . ? 
C29A C31 1.72(3) . ? 
C29B C31 1.51(2) . ? 
C29B C30 1.53(3) . ? 
C29B C32B 1.62(3) . ? 
C32B C36A 1.52(3) . ? 
C33A C33B 0.85(2) . ? 
C33A C34 1.37(2) . ? 
C33A C36B 1.54(3) . ? 
C33A C35 1.59(2) . ? 
C33B C34 1.49(2) . ? 
C33B C36A 1.56(3) . ? 
C33B C35 1.58(2) . ? 
C34 C36B 2.03(3) . ? 
loop_ 
_geom_angle_atom_site_label_1 
_geom_angle_atom_site_label_2 
_geom_angle_atom_site_label_3 
_geom_angle 
_geom_angle_site_symmetry_1 
_geom_angle_site_symmetry_3 
_geom_angle_publ_flag 
N1 Zr1 N2 110.3(2) . . ? 
N1 Zr1 N3 113.3(2) . . ? 
N2 Zr1 N3 112.4(2) . . ? 
N1 Zr1 N4 106.5(2) . . ? 
N2 Zr1 N4 107.8(2) . . ? 
N3 Zr1 N4 106.1(2) . . ? 
N1 P1 C9 109.7(4) . . ? 
N1 P1 C1 110.9(4) . . ? 
C9 P1 C1 108.6(4) . . ? 
N1 P1 C5 111.2(4) . . ? 
C9 P1 C5 109.9(5) . . ? 
C1 P1 C5 106.5(5) . . ? 
N2 P2 C13 111.1(3) . . ? 
N2 P2 C17 109.7(3) . . ? 
C13 P2 C17 108.9(4) . . ? 
N2 P2 C21 110.3(4) . . ? 
C13 P2 C21 107.4(5) . . ? 
C17 P2 C21 109.4(5) . . ? 
N3 P3 C33B 111.0(6) . . ? 
N3 P3 C25B 111.8(7) . . ? 
C33B P3 C25B 109.3(9) . . ? 
N3 P3 C29B 113.6(7) . . ? 
C33B P3 C29B 84.2(9) . . ? 
C25B P3 C29B 123.2(10) . . ? 
N3 P3 C25A 111.5(6) . . ? 
C33B P3 C25A 124.4(8) . . ? 
C25B P3 C25A 19.4(8) . . ? 
C29B P3 C25A 109.3(9) . . ? 
N3 P3 C29A 106.2(7) . . ? 
C33B P3 C29A 109.1(9) . . ? 
C25B P3 C29A 109.5(10) . . ? 
C29B P3 C29A 25.1(8) . . ? 
C25A P3 C29A 91.7(9) . . ? 
N3 P3 C33A 108.8(6) . . ? 
C33B P3 C33A 25.4(7) . . ? 
C25B P3 C33A 87.8(9) . . ? 
C29B P3 C33A 107.6(9) . . ? 
C25A P3 C33A 105.7(9) . . ? 
C29A P3 C33A 131.2(9) . . ? 
P1 N1 Zr1 171.1(4) . . ? 
P2 N2 Zr1 170.1(4) . . ? 
P3 N3 Zr1 176.2(4) . . ? 
C37 N4 C38 105.1(8) . . ? 
C37 N4 Zr1 131.9(7) . . ? 
C38 N4 Zr1 122.9(6) . . ? 
C3 C1 C4 107.2(10) . . ? 
C3 C1 C2 108.3(11) . . ? 
C4 C1 C2 107.0(12) . . ? 
C3 C1 P1 118.8(9) . . ? 
C4 C1 P1 108.1(7) . . ? 
C2 C1 P1 107.0(7) . . ? 
C6 C5 C8 109.3(16) . . ? 
C6 C5 C7 104.6(14) . . ? 
C8 C5 C7 109.3(14) . . ? 
C6 C5 P1 109.9(10) . . ? 
C8 C5 P1 116.0(8) . . ? 
C7 C5 P1 107.1(9) . . ? 
C11 C9 C10 110.6(12) . . ? 
C11 C9 C12 104.5(12) . . ? 
C10 C9 C12 107.9(11) . . ? 
C11 C9 P1 107.1(7) . . ? 
C10 C9 P1 116.9(7) . . ? 
C12 C9 P1 109.1(8) . . ? 
C15 C13 C14 103.6(10) . . ? 
C15 C13 C16 109.3(9) . . ? 
C14 C13 C16 107.2(9) . . ? 
C15 C13 P2 109.7(6) . . ? 
C14 C13 P2 109.8(7) . . ? 
C16 C13 P2 116.4(6) . . ? 
C20 C17 C19 106.3(10) . . ? 
C20 C17 C18 107.9(9) . . ? 
C19 C17 C18 109.2(10) . . ? 
C20 C17 P2 109.2(7) . . ? 
C19 C17 P2 110.1(8) . . ? 
C18 C17 P2 113.9(7) . . ? 
C23 C21 C24 105.1(11) . . ? 
C23 C21 C22 111.6(11) . . ? 
C24 C21 C22 108.3(12) . . ? 
C23 C21 P2 106.6(8) . . ? 
C24 C21 P2 107.7(8) . . ? 
C22 C21 P2 116.9(8) . . ? 
C25B C25A C26 80(3) . . ? 
C25B C25A C28B 168(3) . . ? 
C26 C25A C28B 88.5(17) . . ? 
C25B C25A C27 79(3) . . ? 
C26 C25A C27 118.8(14) . . ? 
C28B C25A C27 104.3(16) . . ? 
C25B C25A P3 80(2) . . ? 
C26 C25A P3 113.7(13) . . ? 
C28B C25A P3 108.3(15) . . ? 
C27 C25A P3 117.7(11) . . ? 
C25A C25B C26 75(3) . . ? 
C25A C25B C28A 163(3) . . ? 
C26 C25B C28A 88.5(17) . . ? 
C25A C25B C27 78(3) . . ? 
C26 C25B C27 116.8(15) . . ? 
C28A C25B C27 105.9(17) . . ? 
C25A C25B P3 81(2) . . ? 
C26 C25B P3 112.9(14) . . ? 
C28A C25B P3 110.6(16) . . ? 
C27 C25B P3 117.7(13) . . ? 
C25A C26 C25B 25.0(10) . . ? 
C25B C27 C25A 23.2(9) . . ? 
C25A C28B C32A 111(2) . . ? 
C25B C28A C36B 112.0(19) . . ? 
C29B C29A C30 87(3) . . ? 
C29B C29A C32A 173(3) . . ? 
C30 C29A C32A 96.4(19) . . ? 
C29B C29A C31 61(2) . . ? 
C30 C29A C31 113.6(17) . . ? 
C32A C29A C31 112.1(17) . . ? 
C29B C29A P3 72.4(15) . . ? 
C30 C29A P3 115.5(15) . . ? 
C32A C29A P3 110.4(16) . . ? 
C31 C29A P3 108.4(12) . . ? 
C29A C29B C31 89(2) . . ? 
C29A C29B C30 59(2) . . ? 
C31 C29B C30 114.2(15) . . ? 
C29A C29B C32B 153(3) . . ? 
C31 C29B C32B 104.2(15) . . ? 
C30 C29B C32B 93.2(16) . . ? 
C29A C29B P3 82.5(16) . . ? 
C31 C29B P3 123.0(14) . . ? 
C30 C29B P3 109.4(13) . . ? 
C32B C29B P3 108.2(14) . . ? 
C29A C30 C29B 33.2(11) . . ? 
C29B C31 C29A 29.1(9) . . ? 
C36A C32B C29B 111.2(19) . . ? 
C29A C32A C28B 103.4(19) . . ? 
C33B C33A C34 81(2) . . ? 
C33B C33A C36B 169(3) . . ? 
C34 C33A C36B 87.8(16) . . ? 
C33B C33A C35 74.0(19) . . ? 
C34 C33A C35 115.5(14) . . ? 
C36B C33A C35 112.5(15) . . ? 
C33B C33A P3 71.2(14) . . ? 
C34 C33A P3 113.6(13) . . ? 
C36B C33A P3 112.8(14) . . ? 
C35 C33A P3 112.5(11) . . ? 
C33A C33B C34 65.0(19) . . ? 
C33A C33B C36A 155(2) . . ? 
C34 C33B C36A 89.9(15) . . ? 
C33A C33B C35 75.0(19) . . ? 
C34 C33B C35 109.2(13) . . ? 
C36A C33B C35 112.9(14) . . ? 
C33A C33B P3 83.4(14) . . ? 
C34 C33B P3 112.7(12) . . ? 
C36A C33B P3 110.9(13) . . ? 
C35 C33B P3 117.9(11) . . ? 
C33A C34 C33B 34.0(10) . . ? 
C33A C34 C36B 49.6(12) . . ? 
C33B C34 C36B 83.6(13) . . ? 
C33B C35 C33A 31.0(8) . . ? 
C33A C36B C28A 98.1(17) . . ? 
C33A C36B C34 42.6(10) . . ? 
C28A C36B C34 132.3(18) . . ? 
C32B C36A C33B 104.3(18) . . ? 
_diffrn_measured_fraction_theta_max 0.979 
_diffrn_reflns_theta_full 23.32 
_diffrn_measured_fraction_theta_full 0.979 
_refine_diff_density_max 0.991 
_refine_diff_density_min -0.781 
_refine_diff_density_rms 0.103 
#===end
